# 1 Directionality of neural activity in and out of the seizure onset 2 zone in focal epilepsy

3

4 Hamid Karimi-Rouzbahani<sup>1-3</sup>, Aileen McGonigal<sup>1-3</sup>

5 <sup>1</sup>Neurosciences Centre, Mater Hospital, South Brisbane, 4101, Australia

6 <sup>2</sup>Mater Research Institute, University of Queensland, South Brisbane, 4101, Australia

7 <sup>3</sup>Queensland Brain Institute, University of Queensland, St Lucia, 4072, Australia

8

9 Correspondence to: Hamid Karimi-Rouzbahani

10 [hamid.karimi-rouzbahani@uq.edu.au](mailto:hamid.karimi-rouzbahani@uq.edu.au)

11

## 12 Abstract

13 Epilepsy affects over 50 million people worldwide, with approximately 30% experiencing drug-  
14 resistant forms that may require surgical intervention. Accurate localisation of the epileptogenic zone  
15 (EZ) is crucial for effective treatment, but how best to use intracranial EEG data to delineate the EZ  
16 remains unclear. Previous studies have used the directionality of neural activities across the brain to  
17 investigate seizure dynamics and localise the EZ. However, the different connectivity measures used  
18 across studies have often provided inconsistent insights about the direction and the localisation  
19 power of signal flow as a biomarker for EZ localisation. In a data-driven approach, this study employs  
20 a large set of 13 distinct directed connectivity measures to evaluate neural activity flow in and out  
21 the seizure onset zone (SOZ) during interictal and ictal periods. These measures test the hypotheses  
22 of "sink SOZ" (SOZ dominantly receiving neural activities during interictal periods) and "source SOZ"  
23 (SOZ dominantly transmitting activities during ictal periods). While the results were different across  
24 connectivity measures, several measures consistently supported higher connectivity directed  
25 towards the SOZ in interictal periods and higher connectivity directed away during ictal period.  
26 Comparing six distinct metrics of node behaviour in the network, we found that SOZ separates itself  
27 from the rest of the network allowing for the metric of "eccentricity" to localise the SOZ more  
28 accurately than any other metrics including "in strength" and "out strength". This introduced a novel  
29 biomarker for localising the SOZ, leveraging the discriminative power of directed connectivity  
30 measures. This preprint explains novel research which is awaiting publication. By using a comprehensive, objective and data-

31 driven approach, this study addresses previously unresolved questions on the direction of neural  
32 activities in seizure organisation, and sheds light on dynamics of interictal and ictal activity in focal  
33 epilepsy.

## 34 Keywords

35 drug-resistant epilepsy, seizure onset zone (SOZ) localisation, directed connectivity, brain networks

## 36 Introduction

37 More than 50 million people worldwide have epilepsy (Kwan & Brodie, 2000), and in about 30% of  
38 them, anti-seizure medications cannot effectively control the disorder (Chen et al., 2018). In cases of  
39 focal epilepsy, where seizures originate from a specific part of one hemisphere, those with drug-  
40 resistant forms may undergo presurgical evaluations to identify seizure-generating areas. This often  
41 involves intracranial electroencephalography (EEG) to delineate the epileptogenic zone (EZ),  
42 considered to be the sites primarily responsible for generating seizures (Lagarde & Bartolomei,  
43 2024). If the clinical risk-benefit analysis is favourable, the EZ can be surgically removed or  
44 disconnected through resection or laser ablation. Despite advancements in multimodal approaches  
45 like magnetic resonance imaging (MRI), electroencephalography (EEG) and positron emission  
46 tomography (PET) scans, and extensive clinical expertise, accurate localisation of the EZ remains  
47 challenging and can hinder achieving seizure freedom (Vakharia et al., 2018).

48

49 Quantification methods have shown significant potential in localising the EZ by analysing intracranial  
50 EEG signals (Bartolomei et al., 2017; Bernabei et al., 2023; Gentiletti et al., 2022; Grinenko et al.,  
51 2018; Karimi-Rouzbahani & McGonigal, 2024). These methods typically focus on either the interictal  
52 or ictal time windows. In the ictal window, the most common epileptiform activities include low  
53 voltage fast activity (LVFA), baseline slow wave shifts, rhythmic spikes/spike-waves, and preictal low  
54 frequency spiking which are more dominant in seizure onset zone (SOZ<sup>1</sup>), where seizures are thought  
55 to originate from (Bernabei et al., 2023). These features have been successfully extracted from  
56 signals and used for EZ localization in previous studies (Di Giacomo et al., 2024; Grinenko et al.,  
57 2018). In the interictal window, traditional epileptiform characteristics which are quantified include  
58 interictal spikes/discharges and high-frequency oscillations (HFOs), with ongoing debate about which  
59 is more effective and ultimately possible increased predictive power by measuring their co-  
60 occurrence (Roehri et al., 2018). While clinical observations and animal models suggest spatial

---

<sup>1</sup> In this work we define the epileptogenic zone (EZ) as the areas primarily responsible for generating seizures (Lagarde & Bartolomei, 2024; Ryvlin et al., 2024) and the seizure onset zone as where seizures start from (Bernabei et al., 2023). Nonetheless, this work analyses the directed connectivity only relative to the SOZ, but we try to use the term used in the original studies when reporting their results.

61 overlap between interictal and ictal neural activities to a variable degree (Avoli et al., 2006), the  
62 temporal balance between interictal and ictal states may depend on the directionality of activities  
63 measured using functional connectivity properties (Gunnarsdottir et al., 2022; Lagarde, Roehri,  
64 Lambert, Trebuchon, et al., 2018). Beyond the abovementioned epileptogenic patterns of ictal (e.g.,  
65 LVFA, baseline shifts) and interictal activity (e.g., spikes and HFOs) various other more complex and  
66 often nonlinear features have also been successful in localising the SOZ in both windows (Andrzejak  
67 et al., 2012; Mooij et al., 2020; Sato et al., 2019). In a recent work, we evaluated the performance of  
68 a large array of 34 distinct signal features in localising the EZ in both interictal and ictal windows. We  
69 showed that signal power and network-based connectivity features were among the most localising  
70 features and were among the most generalisable features across patients (Karimi-Rouzbahani &  
71 McGonigal, 2024).

72

73 While many traditional methods for EZ localization focused on univariate or single-channel signal  
74 activity, there has been a shift towards multivariate, multi-channel or network-based localisation  
75 (Gallagher et al., 2023; Gunnarsdottir et al., 2022; Johnson et al., 2023; Karimi-Rouzbahani et al.,  
76 2024; Lagarde, Roehri, Lambert, Trebuchon, et al., 2018; A. Li et al., 2018, 2021). This approach aligns  
77 with the understanding of epilepsy as a network disorder (Kramer & Cash, 2012; Spencer, 2002) and  
78 has demonstrated better localisation performance compared to univariate methods in several  
79 studies (Balatskaya et al., 2020a; Bernabei et al., 2022; Kini et al., 2019). These have established the  
80 connectivity measures as valuable biomarkers for EZ localisation. In the interictal period, the  
81 consensus is that connectivity is higher within the EZ than within the non-involved zones (NIZ) and  
82 that EZ is relatively disconnected from the NIZ (Johnson et al., 2023; Lagarde, Roehri, Lambert,  
83 Trébuchon, et al., 2018). In the ictal period, areas within the SOZ increase their internal connectivity  
84 and become less connected to non-SOZ areas upon seizure onset (Liu et al., 2021; Runfola et al.,  
85 2023; Schindler et al., 2007; Warren et al., 2010). While these studies showed consensus on  
86 increased connectivity within the EZ/SOZ and decreased connectivity between EZ/SOZ and non-  
87 involved areas, they generally focused on non-directed connectivity methods. Non-directed methods  
88 quantify the level of connectivity or interaction between areas but remain silent about the direction  
89 of activity flow. Specifically, they quantify the interaction without providing information about  
90 whether an area dominantly sends or receives neural activities from other connected areas.

91

92 Recent studies have focused on directed connectivity measures for the localisation of the EZ (Jiang et  
93 al., 2022; Z. Li et al., 2023; Nahvi et al., 2023). Directed connectivity methods provide insights into

94 the direction of neural activities relative to each individual brain area and have shown better  
95 localising performance than non-directed connectivity measures (Narasimhan et al., 2020). The  
96 knowledge about the directionality of neural activity flows within and across epileptogenic networks  
97 can provide valuable insights such as where seizures are generated and how they are propagated.  
98 Specifically, one hypothesis in epilepsy, which has attracted increasing attention, is the “interictal  
99 suppression hypothesis”, which posits that the EZ is inhibited by other brain areas in the interictal  
100 period (i.e. that this is why the brain does not continuously seize in subjects with epilepsy), and that  
101 seizures occur when this inhibition mechanism fails (Doss et al., 2024; Gunnarsdottir et al., 2022;  
102 Jiang et al., 2022; Johnson et al., 2023; Narasimhan et al., 2020; Paulo et al., 2022; Vlachos et al.,  
103 2017). However, findings are non-unanimous with some studies showing that interictal neural  
104 activities are dominantly towards the EZ (Gunnarsdottir et al., 2022; Jiang et al., 2022; Johnson et al.,  
105 2023; Narasimhan et al., 2020; Paulo et al., 2022; Vlachos et al., 2017) and others showing outward  
106 from the SOZ (Amini et al., 2011; Bettus et al., 2011; Lagarde, Roehri, Lambert, Trebuchon, et al.,  
107 2018; Wilke et al., 2009). In the ictal period also, the intuition is that SOZ not only initiates the  
108 seizures but also transmits activity to other brain areas. However, the application of directed  
109 connectivity measures has shown discrepant results with some studies showing that ictal activity  
110 propagates from the SOZ to other areas (Balatskaya et al., 2020b; Courtens et al., 2016; Jung et al.,  
111 2011; Yang et al., 2018) supporting a change of role from “sink” to “source” of activity (Gunnarsdottir  
112 et al., 2022; Jiang et al., 2022). Nonetheless, other studies have shown the opposite direction of  
113 neural activities dominantly *towards* the SOZ in the ictal period (An et al., 2020; Janca et al., 2021;  
114 Mao et al., 2016; Nahvi et al., 2023). While the dominant outflow from the SOZ can be explained by a  
115 significant increase in power in the SOZ being propagated to other areas (Liou et al., 2020), it has  
116 been postulated that the latter can possibly be justified by potential efforts of the non-SOZ areas to  
117 inhibit and stop the seizure (surrounding inhibition) (Schevon et al., 2012).

118  
119 One main reason for the discrepancy between studies evaluating the direction of activity flow  
120 (connectivity) could be the different directed connectivity methods used in different studies (Lagarde  
121 et al., 2022; Lagarde & Bartolomei, 2024). As each of directed connectivity methods is  
122 mathematically distinct, they rely on distinct aspects of signals and their potential relationship (i.e.,  
123 connectivity). For example, while directed transfer function (DTF) measures the influence of one  
124 signal on another in the frequency domain using power analysis and Fourier transform, directed  
125 coherence (DCOH) method uses a spectral transfer matrix and normalises the inflow from one signal  
126 to another by their noise covariance (Baccalá & Sameshima, 2001). Considering such significant  
127 mathematical difference in the directed connectivity methods, this could be suspected to potentially

128 contribute different levels and sometimes opposite directions of activity flow across studies (Plomp  
129 et al., 2014). Therefore, the development of more objective and data-driven approaches are required  
130 to determine the direction of activity towards and away from the SOZ (Doss et al., 2024; Lagarde &  
131 Bartolomei, 2024).

132

133 This study aims to establish the direction of neural activity in and out of the SOZ, in an unbiased,  
134 data-driven, and objective fashion. To that end, we used a large set of 13 mathematically distinct  
135 methods for quantifying directed connectivity used in the literature in the interictal and ictal periods.  
136 We then used network-analysis metrics (also known as connectomes (Doss et al., 2024)) including *in*  
137 *strength* and *out strength* to determine the dominant direction of broadband activity flow in and out  
138 of the SOZ. The aim is to see if the activities generally and dominantly flow towards or away from the  
139 SOZ and test the sink/source hypotheses in epilepsy with minimal effect of subjective method  
140 selection. Moreover, the knowledge about the directionality of neural activities in the interictal and  
141 ictal periods, if meaningful, can inform the development of automated EZ localisation methods.  
142 Specifically, if the SOZ were consistently at the receiving end of activity in the interictal period, this  
143 could be a valuable localising piece of information for localisation algorithms. Therefore, to evaluate  
144 the localisation power of the directed connectivity methods in intracranial recording, we combined  
145 all directed connectivity methods to localise the SOZ in both interictal and ictal periods.

146

## 147 Methods

148

### 149 Dataset

150 This study uses a well-structured open-access intracranial dataset which brings together data from  
151 multiple centres (Bernabei et al., 2022; Kini et al., 2019). The dataset includes 57 patients who had  
152 been implanted with either subdural grid/strip (termed “electrocorticography” (ECoG)) or SEEG as  
153 their presurgical workup, and subsequently treated with surgical resection or laser ablation. Two  
154 patients’ data were excluded from our analyses as one had no interictal and the other no ictal  
155 recordings. Among the 55 patients analysed, 27 patients’ magnetic resonance imaging findings were  
156 lesional (28 non-lesional) and 35 patients were implanted with SEEG (20 ECoG (long-term subdural  
157 grid/strip recordings)). Thirty-four patients had Engel I, 6 Engel II, 11 Engel III and 2 had Engel IV  
158 outcomes. Resections/ablations targeted frontal (FRT) areas in 10 patients, temporal (TPR) in 24,  
159 mesiotemporal (MTL) in 15, insular in 2, frontoparietal in 1, parietal in 1 and mesiofrontal areas in 2  
160 patients (see patient demographics in Supplementary Table 1). Clinically determined seizure onset

161 channels were provided. Each patient had 2 interictal recordings and between 1 to 5 (*mean* = 3.7)  
162 ictal recordings/seizures (110 interictal and 204 ictal recordings over all patients). The interictal data  
163 was selected from awake brain activities determined both by the selection of day-time recordings (8  
164 am – 8 pm) and the use of a custom non-REM sleep detector (explained in detail in (Bernabei et al.,  
165 2022)). The interictal data were at least 2 hours before the beginning of a seizure and at least 2 hours  
166 after a subclinical seizure, 6 hours after a focal seizure and 12 hours after a generalised seizure, free  
167 of spikes if possible and not within the first 72 h of recording to minimize immediate implant and  
168 anaesthesia effects. Epileptogenic zones/resected areas ranged from frontal, frontoparietal,  
169 mesiofrontal, temporal, mesiotemporal, parietal and insular areas.

170

### 171 [Pre-processing](#)

172 Bad channels, as marked in the dataset, were excluded from analyses. An average of 105.6 contacts  
173 (*std* = 38.04) per patient remained after bad channels were removed. There was an average of 114.2  
174 (*std* = 41.2) and 88.8 (*std* = 25.3) channels recorded in patients implanted with SEEG and ECoG,  
175 respectively. Among these, an average of 12.87% (*std* = 11.1%) of channels were in the SOZ area in  
176 each patient. The sampling frequencies of the signals varied across patients and ranged from 256 to  
177 1024 Hz. We adjusted the sampling rate to 256 Hz across patients for analyses. We applied a 60Hz  
178 notch filter to the data to remove line noise. To reduce the computational load, we only kept a  
179 maximum of 30 contacts per patient for analysis - in a random sampling procedure, we kept all the  
180 channels within the SOZ, and the other channels (remaining of 30) were randomly selected from  
181 non-SOZ contacts which were inside the grey matter and at least 10 mm away from other contacts.

182

### 183 [Calculation of directed connectivity measures](#)

184 We selected a 2-minute window of signal from each interictal recording (4 minutes per patient) and a  
185 patient-specific length of signal from each ictal recording (from seizure onset to the termination of  
186 seizure). Within those windows, we selected three 2-second epochs of data for analysis. The three  
187 epochs were chosen to capture early, mid and late dynamics of the signals within each recording.  
188 Specifically, in the 2-minute interictal window, the early, mid and late epochs were separated by 59  
189 seconds, and in the ictal period, the early and late epochs were separated by the length of the  
190 seizure while the mid epoch was in between the two windows. Our choice of 2-second epochs was to  
191 to select a mid-range epoch compared to previous studies which have used a wide range of epochs  
192 from 0.25s to 10 minutes to calculate connectivity in the interictal (Balatskaya et al., 2020b; Mooij et

193 al., 2020; Sato et al., 2019) and from 20 to 60 seconds in the ictal (Li et al., 2018; Runfola et al., 2023)  
194 data.

195

196 We used the open-source python toolbox called PySpi (Cliff et al., 2023) which implements the  
197 largest set of directed and non-directed connectivity measures for time series (here intracranial EEG  
198 channels). We used the 13 available directed connectivity measures implemented in the toolbox for  
199 this work to follow an unbiased data-driven approach in analysis. The measures are categorised here  
200 into “information theory” (n=6), “frequency-domain” (n=6) and “time-domain” (n=1) methods. We  
201 briefly explain the characteristics of each connectivity measure below. For more information about  
202 each measure, the reader is advised to study the references cited for each measure.

203

204 *Information theory measures*

205 *Additive Noise Model (ANM)*

206 This measure assesses directed nonlinear dependence (or causality) of  $x \rightarrow y$  under the assumption  
207 that the effect variable,  $y$ , is a function of a cause variable,  $x$ , along with an independent noise term  
208 (Hoyer et al., 2008). PySpi utilises the statistic from Causal Discovery Toolbox (CDT) as connectivity.  
209 This involves initially predicting  $y$  from  $x$  using a Gaussian process using a radial basis function kernel,  
210 followed by computing the normalized Hilbert-Schmidt Independence Criterion (HSIC) test statistic  
211 from the residuals. ANM is commonly used in causal inference studies, particularly when the  
212 underlying causal mechanisms are assumed to be deterministic and additive in nature.

213

214 *Information-Geometric Causal Inference (IGCI)*

215 This measure infers causal influence from  $x$  to  $y$  within deterministic systems featuring invertible  
216 functions (Janzing et al., 2012). In IGCI, causal inference is approached by examining the geometric  
217 structure of the joint probability distribution of variables. Specifically, IGCI focuses on estimating the  
218 causal influence of one variable (the cause) on another variable (the effect) by analysing the  
219 statistical dependencies between them. PySpi utilises CDT, where the difference in differential  
220 entropies is computed, with probability density estimated via nearest-neighbour estimators. One of  
221 the key features of IGCI is its ability to handle both linear and nonlinear causal relationships, making  
222 it applicable to a wide range of data types and systems. Additionally, IGCI can be used to infer causal  
223 relationships in scenarios where traditional statistical methods may not be suitable, such as when  
224 dealing with high-dimensional or noisy data.



225

### 226 *Conditional Distribution Similarity Fit (CDS)*

227 This measure provides a quantitative measure of the conditional relationship between variables and  
228 can help identify patterns of dependency or causality in empirical data (Cliff et al., 2023). It  
229 represents the standard deviation of the conditional probability distribution of  $y$  given  $x$ . This  
230 involves estimating the conditional probability distributions by discretising the values of the  $x$  and  $y$   
231 and then computing the standard deviation of these conditional distributions. CDSF does not rely on  
232 specific parametric models to describe the relationship between variables, which makes it ideal for  
233 objective analyses.

234

### 235 *Regression Error-Based Causal Inference (RECI)*

236 This provides an assessment of the causal impact of  $x \rightarrow y$  by measuring the error in a regression of  $y$   
237 on  $x$  using a monomial (power product) model (Blöbaum et al., 2018). The rationale behind this  
238 method is that if there is a causal relationship from  $x$  to  $y$ , the regression model should capture most  
239 of the variation in  $y$ . This statistic corresponds to the Mean Squared Error (MSE) resulting from the  
240 linear regression of the cubic (with a constant term) of  $x$  with  $y$ . While linear regression models are  
241 commonly used, RECI can also be extended to handle nonlinear relationships between variables.

242

### 243 *Causally Conditioned Entropy (CCE)*

244 This measure quantifies the remaining uncertainty in time series  $y$  given the entire causal past of  
245 both time series  $x$  and  $y$  (Cliff et al., 2023). It is computed as a sum of conditional entropies of  $y$  given  
246 the past of both  $x$  and  $y$  with increasing history lengths. CCE is a sophisticated measure for assessing  
247 the causal influence of one time series on another by quantifying the remaining uncertainty in the  
248 target series after conditioning on the past values of both series. It is a versatile tool that can handle  
249 both linear and nonlinear dependencies. For computational efficiency, PySpi sets the history length  
250 of 10. This implies that the joint process is assumed to be, at most, a 10th-order Markov chain. We  
251 used a Gaussian kernel in this work.

252

### 253 *Directed Information (DI)*

254 It is a measure for assessing the information flow from a source time series  $x$  to a target time series  $y$   
255 (Massey, 1990). It is calculated as the difference between the conditional entropy of  $y$  given its own  
256 past and the *CCE*. This measure provides an interpretable framework for understanding causal  
257 influence, as it directly quantifies the amount of information transferred from the source to the



258 target time series. As in *CCE*, the computation of *directed information* is limited to a history length of  
259 10. We used a Gaussian kernel in this work.

260

### 261 *Frequency-domain measures*

262 We also calculated several measures of directed connectivity in the frequency domain. For the  
263 frequency-domain measures, we used the full frequency range of 0 to 128Hz (the upper bound is  
264 limited by the Nyquist theorem to half the sampling rate) to obtain a broad-band index rather than  
265 focusing on a narrow frequency band. This provides general and objective results. The measures are  
266 calculated over 125 uniformly sampled bins across the 0 to 128Hz frequency range and averaged.

267

### 268 *Group Delay (GD)*

269 Group delay quantifies a directed, average time delay between two signals by assessing the slope of  
270 the phase differences as a function of frequency (derived through linear regression) (Hannan &  
271 Thomson, 1973). This slope is computed solely for coherence values that are statistically significant,  
272 and the time delay is acquired through a straightforward rescaling of the slope by  $2\pi$ . The  
273 implementation provides the output in the form of the rescaled time delay statistic. GD's ability to  
274 provide directional, frequency-dependent, and time-resolved measures of the interactions between  
275 signals is valuable. Its reliance on phase differences makes it particularly effective for studying the  
276 temporal dynamics of complex systems.

277

### 278 *Phase Slope Index (PSI)*

279 This measure serves as a directed metric for assessing information flow, computed using the  
280 complex-valued coherence (Nolte et al., 2008). Specifically, it evaluates the consistency of phase  
281 difference alterations across a predefined frequency range, with coherence acting as a weighting  
282 factor. The implementation computes the measure in the frequency domain. Its reliance on phase  
283 coherence makes it robust to noise and effective in identifying directed connectivity within specific  
284 frequency bands. However, *PSI* primarily assumes linear relationships in the phase domain. Nonlinear  
285 interactions may not be fully captured by this measure. Moreover, accurate phase difference  
286 estimation requires high-quality signals. Pre-processing steps such as filtering and artefact removal  
287 are crucial for reliable *PSI* computation.

288

289 *Directed Transfer Function (DTF)*

290 This measure uses cross-spectral density matrix which can be decomposed into a noise covariance  
291 matrix and a spectral transfer matrix (Eichler, 2006). The *directed transfer function* is derived from  
292 this decomposition to quantify the inflow from x to y. This inflow is normalized by the total inflow  
293 from all other signals into y, represented by the row-wise sum of the spectral transfer matrix. It can  
294 provide frequency-specific insights into connectivity, and its normalisation allows for direct  
295 comparison of connectivity between distinct pairs of signals. However, the computationally intensive  
296 nature of the method, its assumption linearity limits the application of DTF in detecting nonlinear  
297 relationships.

298

299 *Directed Coherence (DCOH)*

300 It is calculated from the inflow from x to y using the spectral transfer matrix (as described in DTF) and  
301 is then normalised by their noise covariance (Baccalá & Sameshima, 2001). It can provide frequency-  
302 specific insights into connectivity, and its normalisation allows for direct comparison of connectivity  
303 between distinct pairs of signals. However, the computationally intensive nature of the method, its  
304 assumption linearity limits the application of DCOH in detecting nonlinear relationships. Accurate  
305 estimation of *DCOH* requires high-quality signals. Noise and artefacts in the data can affect the  
306 reliability of the results, necessitating careful pre-processing steps.

307

308 *Partial Directed Coherence (PDCOH)*

309 The partial directed coherence from x to y is determined by the inflow (as described in DTF),  
310 normalized by the total outflow from all other signals into y (the column-wise sum of the spectral  
311 transfer matrix) (Baccalá & Sameshima, 2001). As an advantage to *DCOH*, by considering the  
312 influence of all other signals in the network (on the signals being evaluated), *PDCOH* provides a more  
313 accurate assessment of the true directional relationships between specific signal pairs.

314

315 *Spectral Granger Causality (SGC)*

316 This measure extends the concept of Granger Causality to the frequency domain, enabling the  
317 assessment of causal interactions between signals at specific frequencies (Friston et al., 2014). It is  
318 calculated using the spectral transfer matrix and noise covariance. These are estimated through  
319 either a parametric (VAR model) approach or a nonparametric (spectral factorization) approach. We  
320 used the *nonparametric* method to minimise subjective parameter settings. In the PySpi toolbox is  
321 implemented using the Spectral Connectivity Toolbox. *SGC's* ability to provide frequency-specific and

322 normalized measures of causality makes it particularly useful where understanding the dynamics of  
323 complex systems is important. However, its reliance on linearity and sensitivity to signal quality  
324 should be considered when interpreting the results.

325

326 Time-domain measure

327 *Linear Model Fit (LMFIT)*

328 Linear regression is a widely employed method for assessing independence via model fittings (Cliff et  
329 al., 2023). We employed ridge regression from the toolbox, which uses  $\ell_2$ -norm regularization and  
330 the mean squared error (MSE) resulting from a regression of  $y$  on  $x$ . This measure is a powerful and  
331 widely used statistical method for modelling the directed relationship between signals. Its simplicity,  
332 interpretability, and efficiency make it a valuable tool for relationship analysis, and trend analysis in  
333 various fields of study. However, it has several limiting assumptions including that observations are  
334 independent of each other. Violation of this assumption (e.g., autocorrelation in time series data) can  
335 lead to inaccurate estimates and predictions. Linear regression assumes a linear relationship  
336 between signals. If the true relationship is nonlinear, the model may provide biased or inaccurate  
337 results. Finally, overfitting can occur when the model is too complex relative to the amount of data  
338 available. This can result in poor generalization to new data and unreliable predictions.

339

340 *Node metrics*

341 To characterise the role and behaviour of each node in the brain network, we used several network  
342 analysis metrics (i.e., connectomics). Specifically, in network analysis, each network is composed of  
343 **nodes** which are the electrode contacts here and **links** which are the (assumed) inter-node  
344 connections. Using the open-source brain connectivity toolbox (Rubinov & Sporns, 2010), we  
345 extracted six node metrics to evaluate the node behaviour in the network:

346

347 *In strength* is the sum of inward link weights (connectivity values). Nodes with higher *in strength* are  
348 influential receivers within the network, as they accumulate a significant amount of incoming  
349 influence, resources, or interactions from other nodes.

350

351 *Out strength* is the sum of outward link weights. Nodes with higher *out strength* are influential  
352 senders within the network, as they contribute a significant amount of outgoing influence, resources,  
353 or interactions to other nodes.

354

355 *First passage time* is the expected number of steps it takes a random walker to reach one node from  
356 another. Nodes with higher first passage times are often located on the periphery, farther away from  
357 central or densely connected regions.

358

359 *Clustering coefficient* is the fraction of triangles around a node and is equivalent to the fraction of  
360 node's neighbours that are neighbours of each other. Nodes with higher clustering coefficients are  
361 typically located in densely connected neighbourhoods. These nodes have many connections to  
362 neighbouring nodes, forming cohesive groups or communities.

363

364 *Eccentricity* is the maximal shortest path length between a node and any other node. Nodes with  
365 higher eccentricity are typically located on the periphery of the network. They are farther away from  
366 the central core or densely connected regions.

367

368 *Betweenness centrality* is the fraction of all shortest paths in the network that contain a given node.  
369 Nodes with higher betweenness centrality often serve as bridges or connectors between different  
370 clusters, communities, or groups within the network. They lie on many of the shortest paths  
371 connecting nodes in different regions. Nodes with lower betweenness centrality are typically located  
372 on the periphery of clusters or communities within the network. They have fewer connections to  
373 other nodes and are less likely to lie on shortest paths between nodes.

374

### 375 [Multivariate pattern classification for SOZ localisation](#)

376 We employed a standard multivariate pattern classification approach to localize the seizure onset  
377 zone (SOZ), distinguishing contacts within the SOZ from those outside it (non-SOZ) (Karimi-  
378 Rouzbahani & McGonigal, 2024). Initially, we computed inter-channel directed connectivity values.  
379 Subsequently, we calculated the six aforementioned node metrics for each contact based on the  
380 connectivity matrix, which has a size of  $N \times N$ , where  $N$  represents the number of nodes or contacts.  
381 These metrics were then concatenated and utilised as features for the classifiers. The classification  
382 performance gauged the discriminability of SOZ and non-SOZ contacts using directed connectivity  
383 measures, assessed by the area-under-the-curve (AUC) metric for comprehensive, threshold-free  
384 classification performance. Consistent with recent localisation studies (Jiang et al., 2022; Karimi-

385 Rouzbahani & McGonigal, 2024), we employed decision tree (DT) classifiers, treating each contact as  
386 an observation in classification. Our DT classifiers utilised a random forest algorithm with 50 bags of  
387 feature combinations, suitable for nonlinear feature classifications and offering insights into feature  
388 contributions. This approach clarifies the "contribution" of each feature by permuting the contact  
389 labels (i.e., SOZ vs. non-SOZ) in each feature separately and assessing its impact on performance,  
390 where contribution is inversely proportional to performance drop. For classification, we conducted  
391 separate analyses within interictal and ictal time windows for each patient, employing a 10-fold  
392 cross-validation procedure. This procedure was applied individually for each recording data from ictal  
393 and interictal packets and also their combinations. To address the imbalance in the number of SOZ to  
394 non-SOZ contacts and prevent bias toward one class in classification, we employed an up-sampling  
395 procedure to increase the number of observations for the class with fewer observations/contacts,  
396 repeating each classification of data 1000 times before averaging the results. Additionally, we  
397 generated chance-level performances by shuffling (SOZ/non-SOZ) contact labels 1000 times and  
398 recalculating the classification performance, resulting in 1000 chance-level classification outcomes  
399 against which we assessed the significance of our true classification performances.

400

#### 401 [Statistical analysis](#)

402 We employed Bayes Factor (BF) analysis for statistical inference. We compared the AUC levels against  
403 chance-level AUCs and assessed main effects on classifications. We interpreted levels of BF evidence  
404 strictly: BFs above 10 and below 1/10, were considered evidence for the alternative and null  
405 hypotheses, respectively. BFs falling between 1/10 and 10 were regarded as providing insufficient  
406 evidence either way, indicating that no conclusions could be drawn about the difference between a  
407 pair of variables.

408

409 To evaluate the evidence for the null and alternative hypotheses regarding at-chance and above-  
410 chance classification, respectively, we compared the classification rates in each analysis with those  
411 obtained from null distributions of the same analysis. For this purpose, we conducted an unpaired  
412 Bayes factor t-test for the alternative (i.e., difference from chance; H1) and the null (i.e., no  
413 difference from chance; H0) hypotheses.

414

415 To assess the evidence for the null and alternative hypotheses regarding the difference between  
416 contributions across measures and metrics, we compared the contributions obtained from each of  
417 these conditions using paired Bayes factor t-tests.

418

419 For evaluating the main effects of surgery outcome (Engel I/Engel II-IV), region of resection  
420 (FRT/TPRMTL), pathology (lesional/non-lesional), and recording modality (SEEG/ECOG), we employed  
421 a Bayes factor ANOVA. In this analysis, these four factors served as independent variables, with  
422 classification/generalization AUC as the dependent variable.

423

424 To ensure statistical power in ANOVA, we excluded patients with insular, frontoparietal, parietal, and  
425 mesiofrontal resections, where the sample size was less than 3. Priors for all Bayes factor analyses  
426 were determined based on Jeffrey-Zellner-Siow priors (Jeffreys, 1998; Zellner & Siow, 1980), which  
427 are derived from the Cauchy distribution based on the effect size initially calculated in the algorithm  
428 using t-tests (Rouder et al., 2012).

429

#### 430 [Data and code availability](#)

431 The dataset used in this study was from previous studies and is available at  
432 <https://openneuro.org/datasets/ds004100/versions/1.1.3>. The code developed for this project is  
433 available at [https://github.com/HamidKarimi-Rouzbahani/Intracranial\\_epilepsy\\_connectivity](https://github.com/HamidKarimi-Rouzbahani/Intracranial_epilepsy_connectivity).

434

## 435 [Results](#)

436 We analysed directed connectivity measures of intracranial neural signals in epileptic patients  
437 towards two goals. First, we tested the sink-source hypotheses which suggest that SOZ areas  
438 dominantly receive neural activities during the interictal period (i.e., confirming “sink SOZ”  
439 hypothesis; Figure 1A). This direction was hypothesised to reverse in the ictal period (i.e., confirming  
440 “source SOZ” hypothesis; Figure 1A). Second, we tested to see if directed connectivity measures  
441 could localise the SOZ (Figure 1D). Importantly, to address these goals in a data-driven and objective  
442 manner, we used a large set of 13 distinct measures of directed connectivity to analyse the data  
443 which can clarify if the difference between connectivity methods used could explain the discrepancy  
444 in the literature.

445



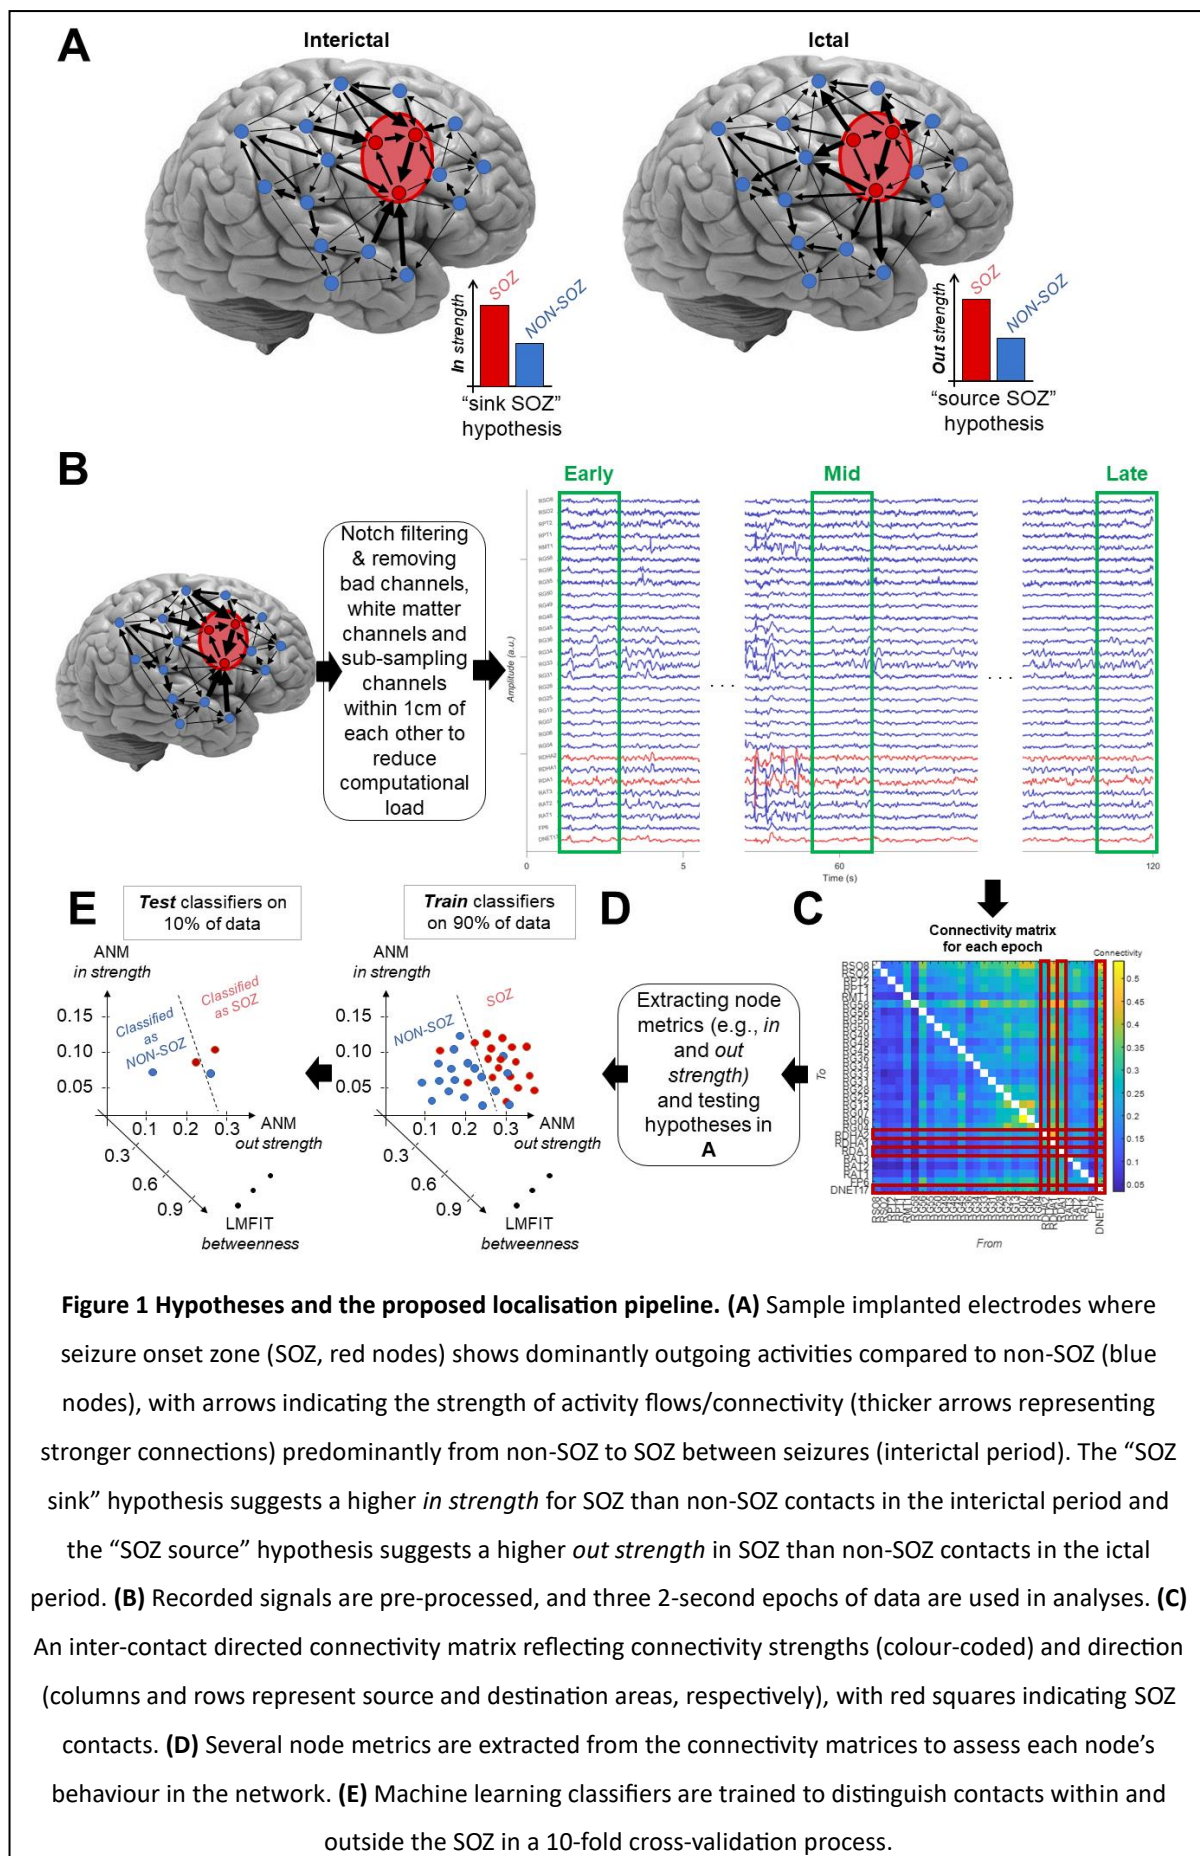



#### 447 Strength of neural activity flow in and out of the SOZ

448 We evaluated the strength of neural activity towards and away from every node (electrode contact)  
449 using *in* and *out strength* node metrics, respectively. Accordingly, nodes with higher *in strength* have  
450 stronger inward connectivity than nodes with lower *in strength*, and nodes with higher *out strength*  
451 have stronger outward connectivity than nodes with lower *out strength* (see *methods*).

452

453 In the interictal period, across the 13 directed connectivity measures tested, there was evidence (BF  
454 > 10) for higher *in strength* in SOZ than non-SOZ areas for 5 connectivity measures (ANM, DI, DTF,  
455 DCOH and PDCOH) and there was evidence (BF > 10) for higher *in strength* in non-SOZ than SOZ  
456 areas only for the CDS connectivity measure. There was insufficient evidence ( $0.1 < \text{BF} < 10$ ) either  
457 way for the rest of the connectivity measures (Figure 2A). In the ictal period, there was evidence (BF  
458 > 10) for higher *out strength* in SOZ than non-SOZ areas for ANM and SGC connectivity measures,  
459 respectively. There was insufficient evidence ( $0.1 < \text{BF} < 10$ ) either way for the rest of the  
460 connectivity measures (Figure 2B).

461

462 The results above were obtained by averaging the results from *early*, *mid* and *late* epochs (time  
463 windows) of the interictal and ictal periods (Figure 1B). To evaluate potential temporal variability in  
464 connectivity, we also evaluated *in strength* and *out strength* for each individual 2-second epoch  
465 (Supplementary Figure 1). The patterns of *in strength* were relatively similar across the three  
466 interictal windows (c.f., Figure 2A). The patterns of *out strength* were also similar across the three  
467 ictal windows and resembled the averaged results (c.f., Figure 2B).

468

469 While higher *in strength* in SOZ than non-SOZ areas (e.g., in the interictal period; c.f., Figure 2A) does  
470 not necessarily correspond to higher *out strength* in non-SOZ than SOZ areas, we tested this opposite  
471 non-hypothesised effect as well to ensure we are not overlooking a relevant effect (Supplementary  
472 Figure 2). In the interictal period, there was evidence (BF > 10) for higher *out strength* in non-SOZ  
473 than SOZ areas for the CDS connectivity measure only. However, there was evidence (BF > 10)  
474 respectively for higher *out strength* in SOZ than non-SOZ areas for ANM and SGC, respectively. In the  
475 ictal period, there was evidence (BF > 10) for higher *in strength* in non-SOZ than SOZ areas for the  
476 CDS only, but also evidence (BF > 10) for higher *in strength* in SOZ than non-SOZ areas. Therefore, the  
477 *out strength* during interictal period and the *in strength* during the ictal period provided inconsistent  
478 results across connectivity measures to support clear directions of activity flows.

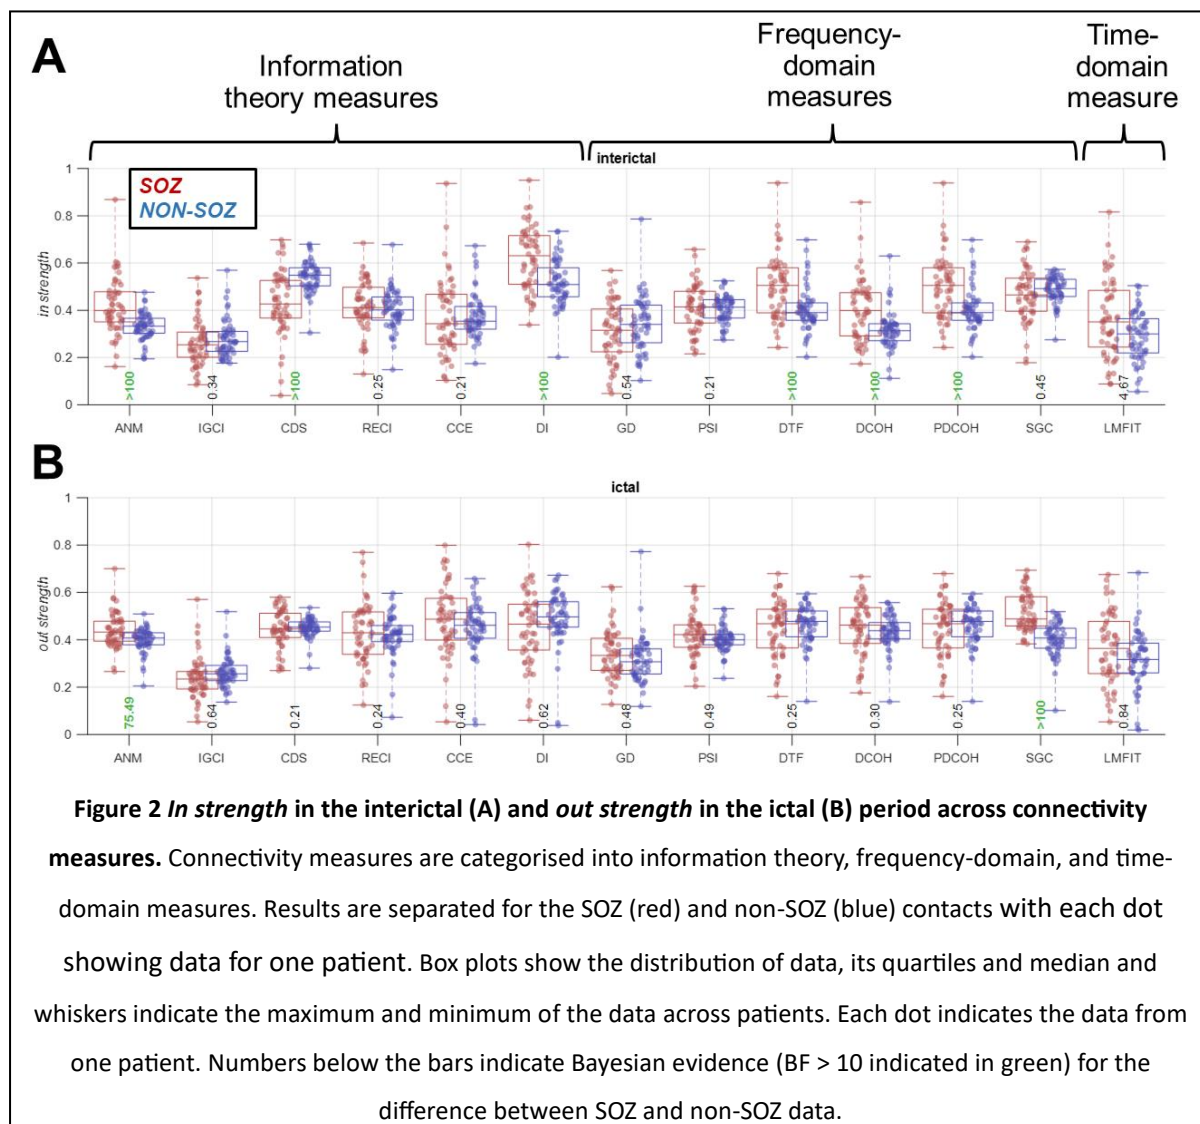

479

480 Together, these results show that distinct measures of connectivity show variable results.

481 Nonetheless, 5 out of 13 connectivity measures consistently supported the “sink SOZ” hypothesis in  
 482 the interictal period. Similarly, but less strongly than in the interictal period, two connectivity  
 483 measures supported the “source SOZ” hypothesis in the ictal period. These results were relatively  
 484 stable within the interictal and ictal periods. Among the 13 connectivity measures evaluated, only  
 485 the ANM measure supported both hypotheses.

486

### 487 [Switching of activity direction from the interictal to ictal period](#)

488 The above results suggested that SOZ areas tend to be the receivers (i.e., sinks) in the interictal  
 489 period and the transmitters (i.e., sources) of neural activity in the ictal period. However, it remains  
 490 unclear if this tendency of switching roles between being a sink or source is consistent across

491 patients (Doss et al., 2024). Specifically, the higher interictal *in strength* in SOZ compared to non-SOZ  
492 and the higher ictal *out strength* in non-SOZ compared to SOZ could have come from distinct subset  
493 of patients. To rule this out, we evaluated the correlation between effect sizes in the interictal and  
494 ictal periods: effects sizes were calculated as  $\Delta = in\ strength_{SOZ} - in\ strength_{non-SOZ}$  during  
495 interictal and  $\Delta = out\ strength_{SOZ} - out\ strength_{non-SOZ}$  during ictal period (Figure 3A). Majority  
496 (8 out of 13) of connectivity measures showed a positive correlation between the direction of effects  
497 across the interictal and ictal periods over patients with 5 reaching significance at  $p < 0.01$  (*Pearson*  
498 correlation). The rest of the 5 connectivity measures showed non-significant negative correlations.  
499 Significant correlations suggest that patients in whom *in strength* was higher for SOZ compared to  
500 non-SOZ in the ictal period were the same patients in whom the *out strength* was also higher for  
501 non-SOZ compared to SOZ in the interictal period.

502

503 To check if this effect was also consistent at the individual contact level, we performed an additional  
504 correlation-based analysis. To that end, we evaluated the correlation between the level of interictal  
505 *in strength* and ictal *out strength* across SOZ contacts, within each individual patient (Figure 3B, top  
506 panel). Results looked like the cross-patient analysis (c.f., Figure 3A) and showed positive correlations  
507 for 9 of the connectivity measures while the rest showed negative correlations. This suggests that  
508 changes in signal characteristics and connectivity patterns from the interictal to ictal period impacts  
509 distinct connectivity measures differently. We repeated the same analysis to check the correlation  
510 between the level of interictal *out strength* and ictal *in strength* across non-SOZ contacts, which  
511 showed similar results to the SOZ contacts (Figure 3B, bottom panel). The consistent positive  
512 correlations across the nine connectivity measures support that the contacts with higher interictal *in*  
513 *strength* also showed a higher ictal *out strength*. However, the four measures with non-significant  
514 negative correlations, which were all frequency-domain connectivity measures, support a different  
515 transition: the contacts with higher interictal *in strength* showed a lower ictal *out strength*. This  
516 might be because of the significant changes in the frequency characteristics of signals when going  
517 from the interictal to the ictal period which continues to evolve during the seizure period (e.g., low  
518 voltage fast activity (Lagarde et al., 2019)) dominantly impacting the frequency-domain connectivity  
519 measures.

520

521

522

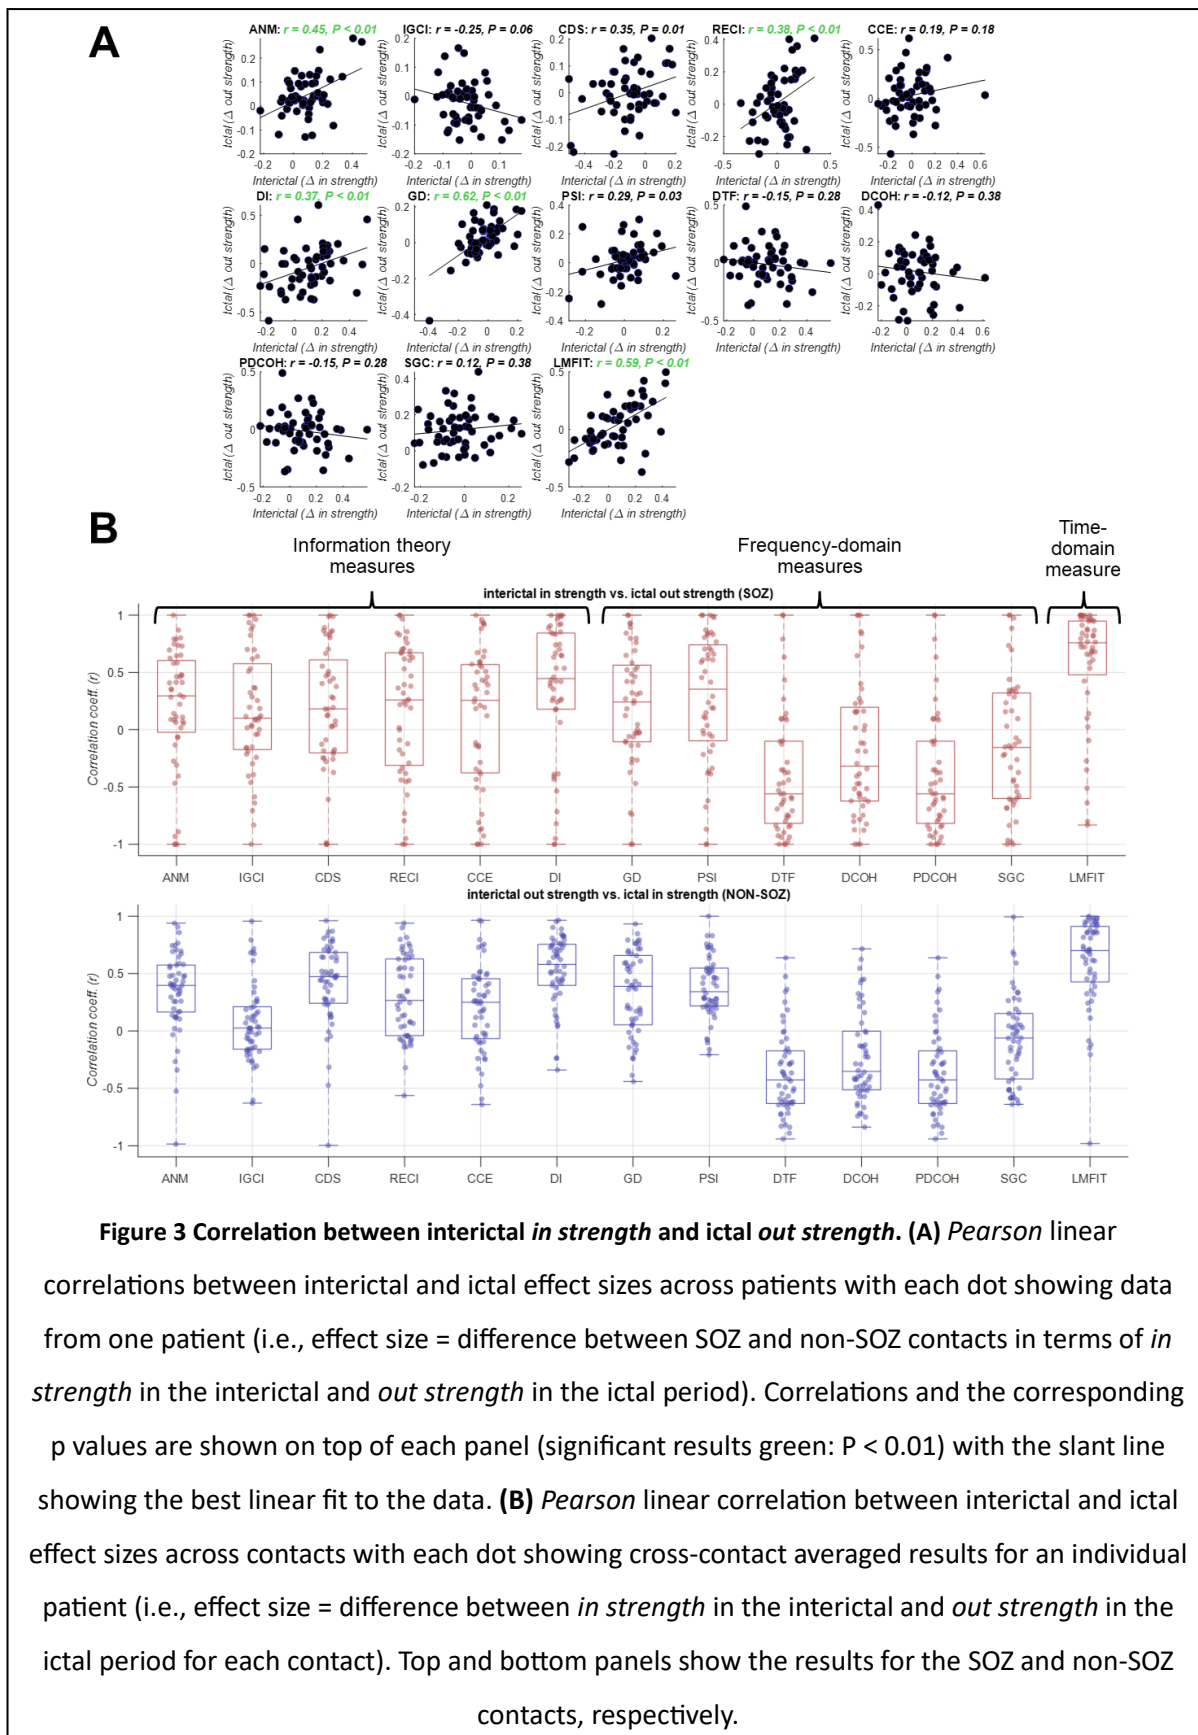

523

524

## 525 Separation of the SOZ from the rest of the network

526 Having tested the “sink and source SOZ” hypotheses, we then tested to see if other node metrics  
527 would distinguish between SOZ and non-SOZ areas. These metrics were extracted from our directed  
528 connectivity measures to determine the role of each node in the network. Initially, similar to *in*  
529 *strength* and *out strength*, we compared SOZ and non-SOZ contacts separately for the interictal and  
530 ictal periods using four additional node metrics including *first passage time*, *clustering coefficient*,  
531 *eccentricity* and *betweenness*.

532

533 In the interictal period (Figure 4A), several node metrics discriminated SOZ from non-SOZ contacts.  
534 For instance, there was evidence ( $BF > 10$ ) for higher *first passage time* in SOZ than non-SOZ for five  
535 (ANM, DI, DTF, DCOH, and PDCOH), and higher *eccentricity* for five (ANM, RECI, DI, SGC, and LMFIT)  
536 connectivity measures. *Clustering coefficient* and *betweenness centrality* showed less consistent  
537 results across connectivity measures. There was evidence ( $BF > 10$ ) for higher *clustering coefficient* in  
538 SOZ than non-SOZ for three connectivity measures (ANM, DI and DCOH) but also evidence ( $BF > 10$ )  
539 for lower *clustering coefficient* in SOZ than non-SOZ for CDS. There was evidence ( $BF > 10$ ) for higher  
540 *betweenness centrality* in SOZ than non-SOZ for three connectivity measures (ANM, RECI and LMFIT)  
541 but also evidence ( $BF > 10$ ) for lower *betweenness centrality* in SOZ than non-SOZ for CDS. Relative  
542 consistency and non-opposing results across connectivity measures in *first passage time* suggest that  
543 SOZ areas has more complex and prolonged interactions with other areas than non-SOZ potentially  
544 due to abnormal neural activity, leading to longer *first passage times*. Higher *eccentricity* in SOZ than  
545 non-SOZ contacts suggests that the SOZ is positioned distantly from the most central nodes in the  
546 network, indicating a more peripheral position or a more complex and distributed network structure  
547 for the SOZ than the non-SOZ.

548

549 In the ictal period, results were less consistent across connectivity measures in terms of *first passage*  
550 *time* and *clustering coefficient* with two connectivity measures higher for SOZ and one higher for  
551 non-SOZ (Figure 4B). There was evidence ( $BF > 10$ ) for higher *eccentricity* in SOZ than non-SOZ for  
552 five connectivity measures (ANM, RECI, PSI, SGC, and LMFIT) similar to the interictal period. There  
553 was evidence ( $BF > 10$ ) for higher *betweenness centrality* in SOZ than non-SOZ for three connectivity  
554 measures (RECI, DCOH and SGC) but also evidence ( $BF > 10$ ) for lower *betweenness centrality* in SOZ  
555 than non-SOZ for IGCI. These results align with the interictal results supporting that SOZ areas reside  
556 in more peripheral and less central part of the brain network reflecting their separation from the rest  
557 of the network.



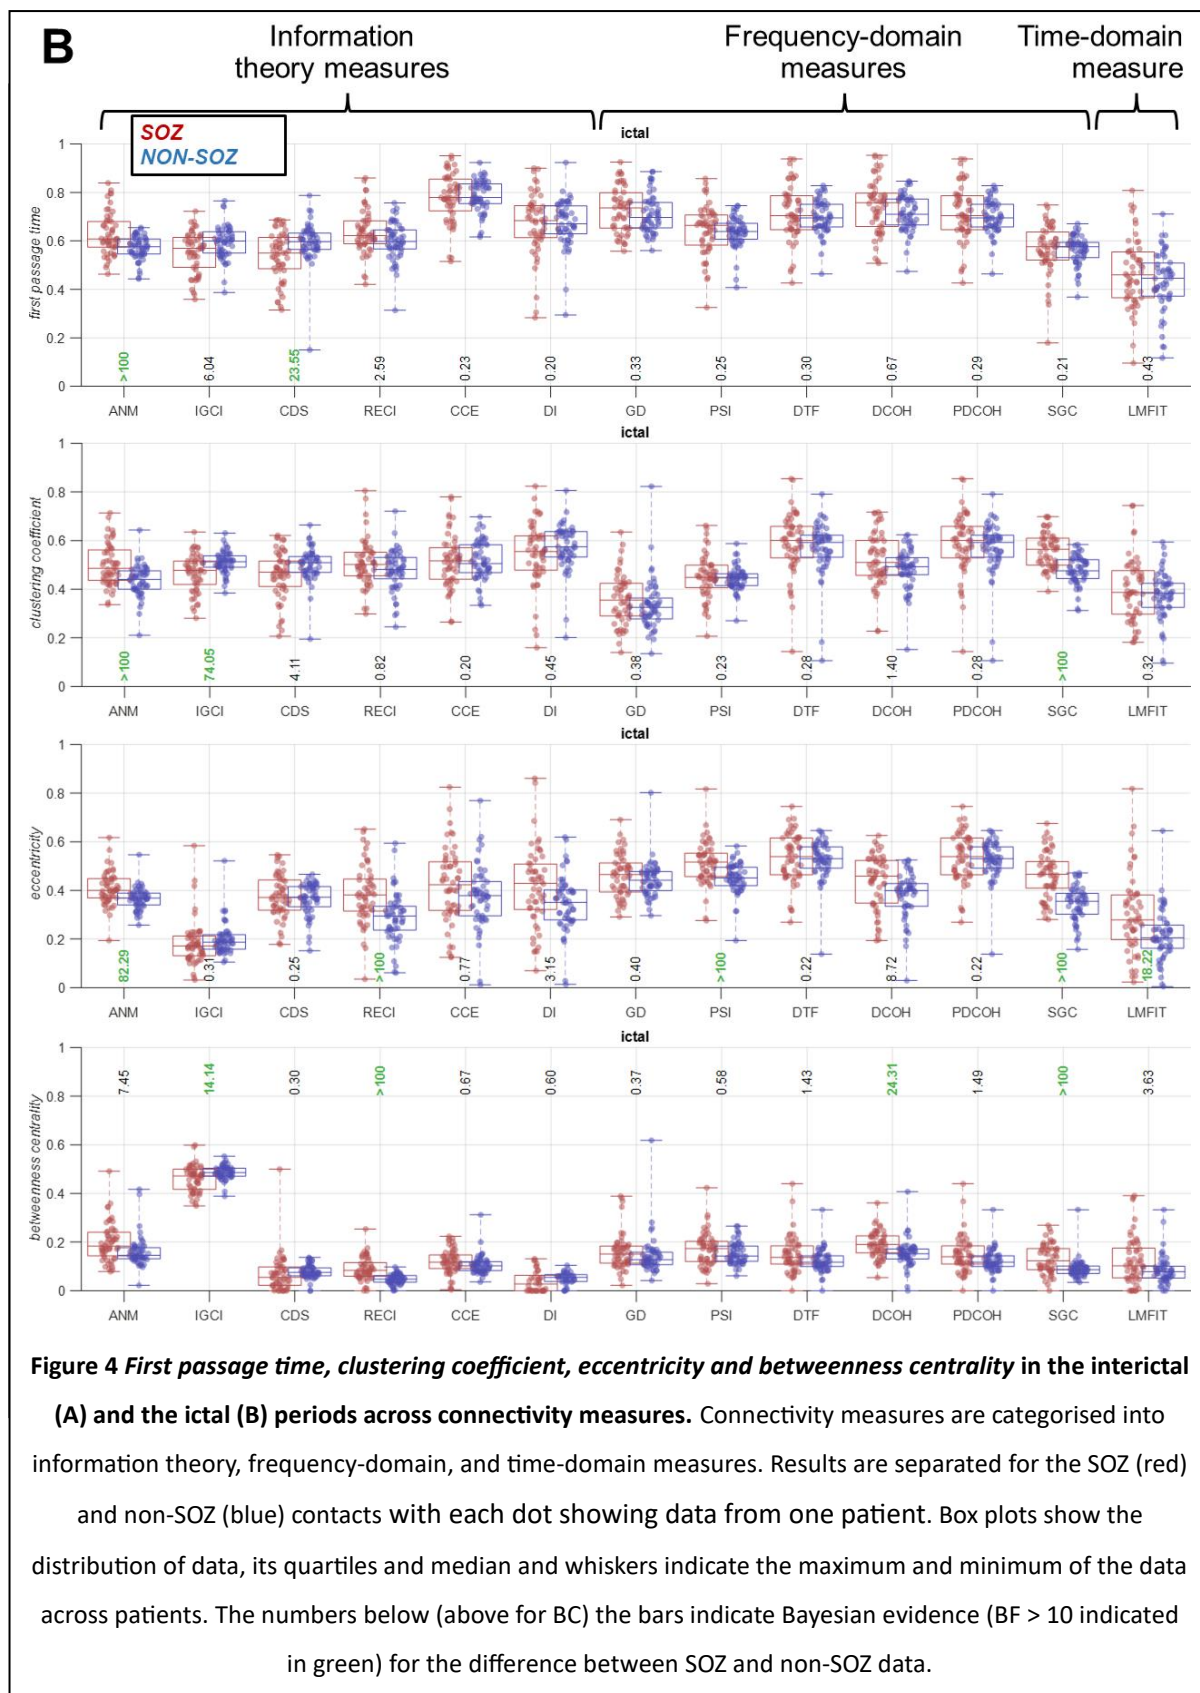

558

559

560 [Localisation of SOZ using node network metrics](#)

561 Finally, we used our set of 6 node metrics extracted from the 13 connectivity measures to see how  
562 precisely we could localise the SOZ. Localisation here refers to the discrimination of contacts within  
563 SOZ from those within non-SOZ areas. To this end, we used a decision-tree machine learning  
564 classifier to classify the SOZ and non-SOZ contacts using the 78-dimensional feature set (6 node  
565 metrics per 13 connectivity measures).

566

567 There was evidence ( $BF > 10$ ) for above-chance (i.e.,  $AUC > 0.5$ ) localisation of the SOZ in both  
568 interictal and ictal periods at the group level (Figure 5A). At the individual level, the performance  
569 varied across patients from around chance level of 0.5 to above 0.9. These results showed that, for  
570 some patients, there was enough information in the directed connectivity measures to predict if a  
571 node was part of the SOZ or not. These results also showed that interictal activity could also provide  
572 as much localisation power as the ictal activity which is dominantly used in clinical practice.

573

574 To see if any of the patient demographic variables (i.e., surgery outcome (Engel I/Engel II-IV), region  
575 of resection (FRT/TPRMTL), pathology (lesional/non-lesional), and recording modality (SEEG/ECOG))  
576 could explain the localisation performance, we performed a Bayes factor ANOVA t-test with these  
577 four factors as independent variables and the localisation performance (AUC) as the dependent  
578 variable. There was insufficient evidence ( $0.1 < BF < 10$ ) for an effect of any of the demographic  
579 variables on the localisation performance in either interictal or ictal data (Supplementary Figure 3).

580

581



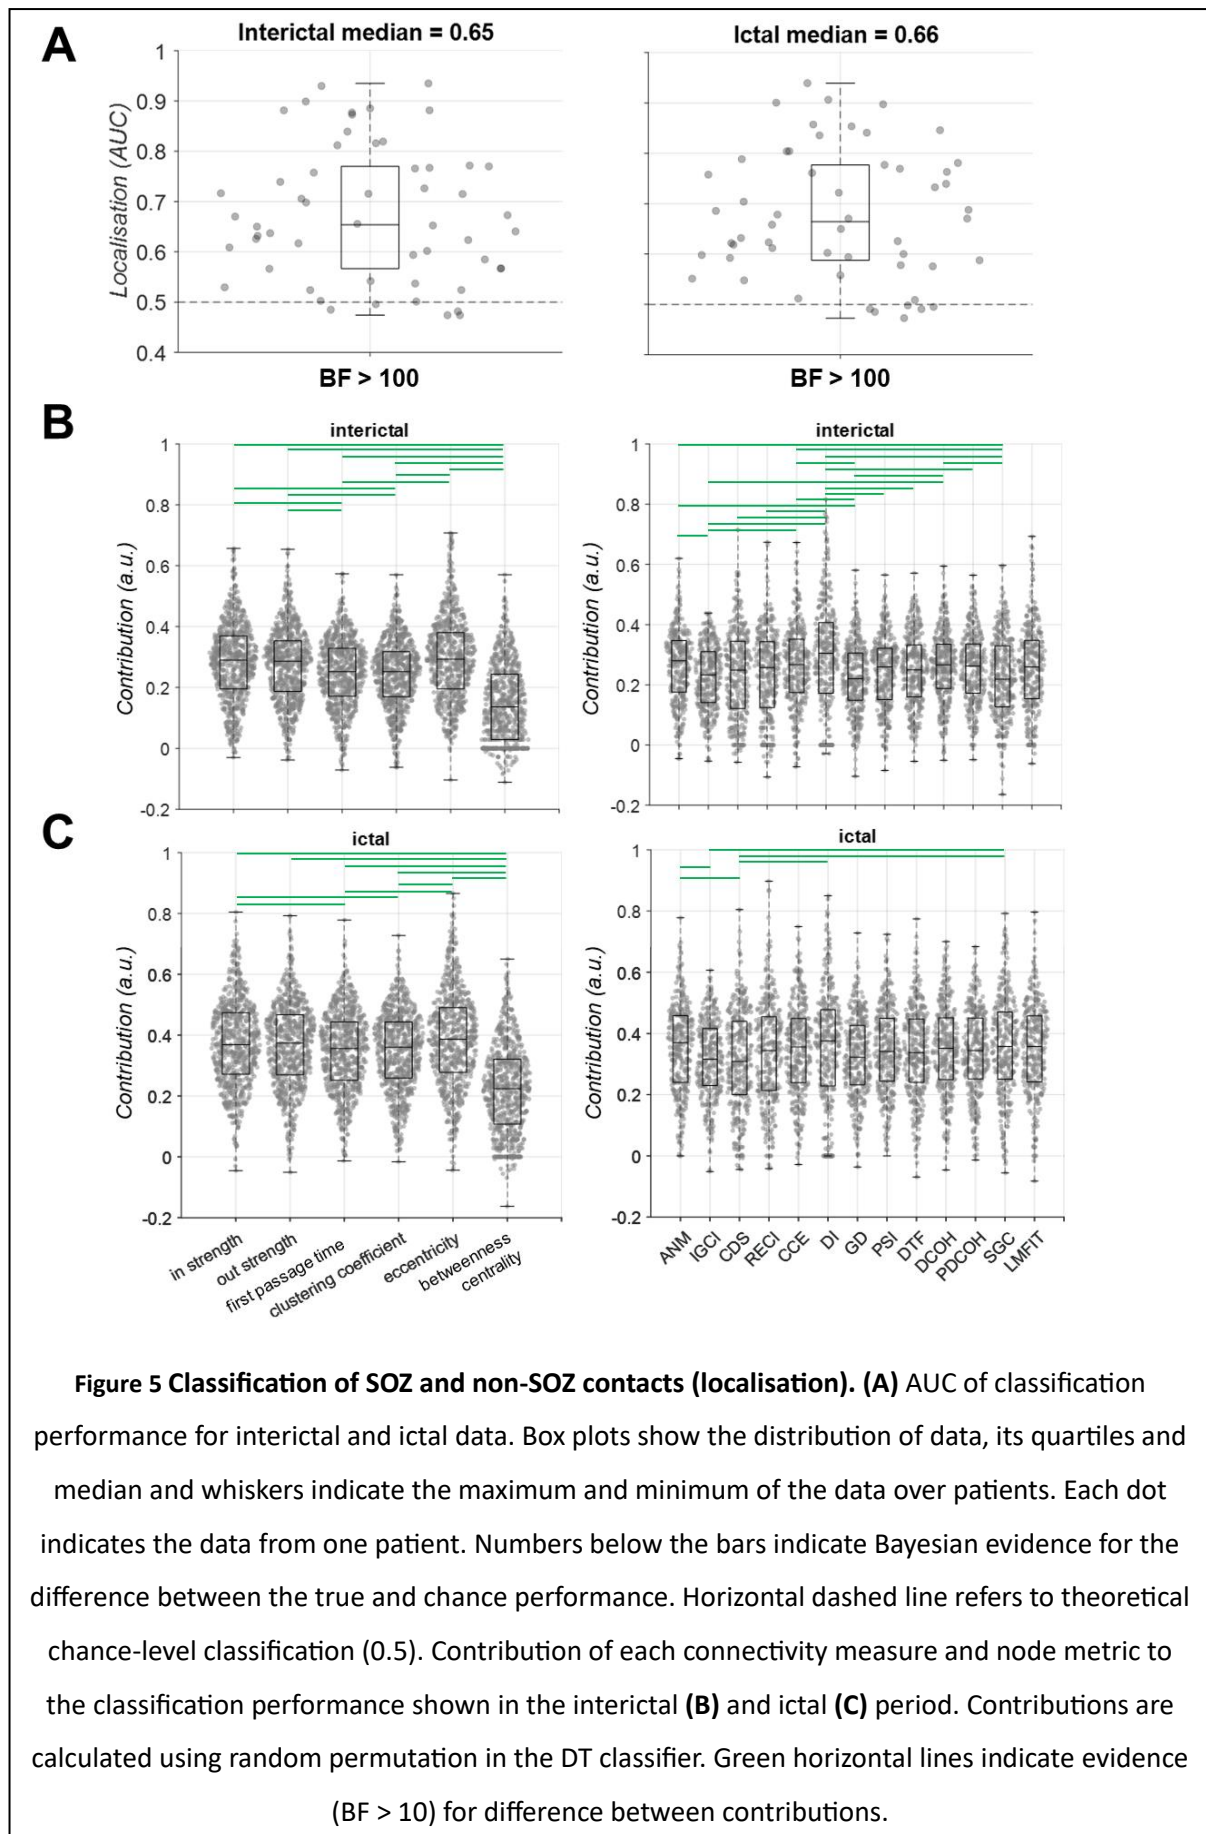

583 We then asked if there was systematic variation across the different recordings (i.e., time windows  
584 when the data was sampled within the interictal data and ictal/seizure data) and analysis epochs  
585 (i.e., early, mid and late). To perform this analysis, classifiers were trained and tested within each  
586 individual recording and epoch. Consistently in interictal and ictal data, we observed a higher  
587 localisation performance when localisation was done separately for each individual recording and  
588 epoch (Supplementary Figure 4) than when they were all combined (c.f., Figure 5A). Moreover, in the  
589 ictal data, we generally observed higher localisation performance in the early than mid and late  
590 epochs of data (Supplementary Figure 4B), which can be explained by a stronger separation of SOZ  
591 from non-SOZ areas at the onset of seizures. Please note that while the early epoch of data always  
592 contained the first two seconds of the ictal activity, the mid and late epochs did not match across  
593 patients as the length of seizures differed.

594

595 We then evaluated the contribution of each connectivity measure and node metric to the localisation  
596 performance. When comparing the contribution of each connectivity measure, we concatenated its  
597 node metrics and when evaluating the contribution of each node metric, we concatenated all the  
598 connectivity measures. We concatenated all patients' data in both analyses. In the interictal period  
599 (Figure 5B), there was evidence ( $BF > 10$ ) for higher contribution of *eccentricity* than *first passage*  
600 *time* and *clustering coefficient* and lower contribution from *betweenness centrality* than the other 5  
601 node metrics. The median contributions of other node metrics varied in the range between the  
602 medians of *betweenness centrality* and *eccentricity*. There was evidence ( $BF > 10$ ) for higher  
603 contributions of DI and ANM and lower contribution of SGC than several other node metrics.

604

605 In the ictal period (Figure 5C), we observed relatively similar contributions of node metrics and  
606 connectivity measures. Specifically, node *eccentricity* and *betweenness centrality* showed the highest  
607 and lowest contributions among other node metrics. There was also evidence ( $BF > 10$ ) for higher  
608 contribution of DI and ANM than other connectivity measures.

609

610 Together, these results show that *in strength* and *out strength* are informative metrics for localising  
611 the SOZ. Importantly, we observed that the node metric of *eccentricity*, which reflects how  
612 peripheral a node's position was in the network, had even higher localisation power. We also  
613 observed that the connectivity metrics of DI and ANM provided the highest localisation power. These  
614 results were consistent across both interictal and ictal periods. We also observed that localisation

615 was improved when done separately for each time window and was higher in early than later epochs  
616 of the ictal data. These show that, there are subtle variations in node connectivity patterns which can  
617 change the discriminability of SOZ from non-SOZ over time.

618

## 619 Discussion

620 This work was aimed towards two goals. First, this study tested if the SOZ in people with focal  
621 epilepsy dominantly receives broadband neural activities in the interictal (resting baseline state)  
622 period (“sink SOZ” hypothesis) and dominantly transmits the activities in the ictal (seizure) period  
623 (“source SOZ” hypothesis). To that end, we utilised a data-driven approach and recruited a set of 13  
624 directed connectivity measures along with 6 metrics of node behaviour in the network. We found  
625 that not all connectivity measures supported the above hypotheses. Nonetheless, we found evidence  
626 across several connectivity measures supporting these hypotheses. These measures showed that SOZ  
627 dominantly received neural activities in the interictal and transmitted them in the ictal period  
628 supporting the idea of seizure suppression and propagation, respectively. Second, this study  
629 evaluated the predictive power of node metrics extracted from the above-mentioned connectivity  
630 measures in localising the SOZ. To that end, we utilised the power of explainable machine learning  
631 classifiers to successfully discriminate contacts within from those outside the SOZ. This work makes  
632 several contributions to our understanding of epilepsy and how hypothesis-driven biomarkers can  
633 localise the SOZ.

634

635 Earlier studies have evaluated the directionality of signals in the interictal and ictal periods. In  
636 interictal data, some studies have suggested a leading role (higher outgoing signals) for the  
637 epileptogenic zone (EZ) (Bettus et al., 2008; Lagarde, Roehri, Lambert, Trébuchon, et al., 2018;  
638 Varotto et al., 2012) whereas others have suggested the opposite (Gunnarsdottir et al., 2022; Jiang et  
639 al., 2022; Narasimhan et al., 2020; Paulo et al., 2022; Vlachos et al., 2017). Similar discrepancy exists  
640 in studies which used ictal data, with some studies suggesting a leading role for the EZ areas  
641 (Balatskaya et al., 2020b; Courtens et al., 2016; Jung et al., 2011; Yang et al., 2018) and others  
642 providing evidence for the opposite (An et al., 2020; Janca et al., 2021; Mao et al., 2016; Nahvi et al.,  
643 2023). One important reason behind these discrepant results could be the variation in the methods  
644 used to measure directed connectivity (Doss et al., 2024; Lagarde et al., 2022; Lagarde & Bartolomei,  
645 2024). Basically, distinct connectivity methods rely on distinct signal features to quantify connectivity.  
646 As we categorised these methods (c.f., Figure 2), some methods rely on the complexity, randomness,  
647 or the predictability of signal samples (information theory methods), whereas some rely on

648 frequency-domain representation of signals (frequency-domain methods) and others simply rely on  
649 one-to-one mapping of time samples across areas (time-domain measures e.g., LMFIT) (Cliff et al.,  
650 2023). Even different methods within each category work differently. For example, while ANM  
651 detects causal relationship which are assumed to be additive with independent noise, IGCI can  
652 detect more complex non-additive relationships. Therefore, it is not surprising to be able to detect  
653 the directed connectivity using one method but not the other.

654

655 Building on the recent developments in neural decoding (Karimi-Rouzbahani, 2024; Karimi-  
656 Rouzbahani, Shahmohammadi, et al., 2021; Karimi-Rouzbahani & Woolgar, 2022) and connectivity  
657 analyses (Cliff et al., 2023; Karimi-Rouzbahani et al., 2022; Karimi-Rouzbahani, Ramezani, et al., 2021)  
658 and trying to avoid subjective analysis, this study adopts a data-driven and objective approach to test  
659 the direction of neural activity flow towards and away from the SOZ, which has been lacking in  
660 previous studies that tend to select a priori methods of connectivity analysis (Lagarde & Bartolomei,  
661 2024). We showed that several connectivity measures showed higher *in strength* towards SOZ than  
662 non-SOZ areas in the interictal and higher *out strength* from SOZ than non-SOZ in the ictal period.  
663 These results supported a switching role for the SOZ which not only supports the hypotheses of “sink  
664 SOZ” in the interictal (Gunnarsdottir et al., 2022) and “source SOZ” in the ictal period (Schindler et  
665 al., 2007), but also serves as a biomarker for localising SOZ. Interestingly, we observed a higher  
666 consistency across connectivity measures in the interictal than ictal period. This might suggest that  
667 while the inflow of activity in the interictal period might be reflected in a wider range of activity  
668 patterns as captured by a higher number of connectivity measures, the outflow of neural activity  
669 might be confined to a limited range of activity patterns (Lagarde et al., 2019). This is supported by  
670 our observation of less cross-patient generalisable epileptogenic patterns in the interictal than ictal  
671 periods (Karimi-Rouzbahani & McGonigal, 2024).

672

673 Only a few studies have evaluated directed connectivity during both interictal and ictal periods in the  
674 same patient population. For example, partial directed coherence (PDCOH) method applied to  
675 patients with type II focal cortical dysplasia showed a higher *out density* (defined as the ratio  
676 between the sum of node degrees and the total number of connections in the network) in the lesion  
677 and SOZ areas than non-SOZ areas supporting the “source SOZ” hypothesis in the ictal data, but did  
678 not find evidence to support “sink SOZ” in the interictal data (Varotto et al., 2012). On the other  
679 hand, phase transfer entropy along with node metrics applied to a sample of 43 temporal lobe  
680 epilepsy patients showed higher *out/in degree ratio* in EZ than non-EZ areas consistently through

681 interictal and ictal data supporting “source SOZ” hypothesis in the ictal period (Wang et al., 2017). A  
682 more recent study used both interictal and ictal data and supported the “sink SOZ” hypothesis in the  
683 interictal and “source SOZ” hypothesis in the ictal data using directed transfer function (DTF)  
684 measure (Jiang et al., 2022). Finally, using a novel source-sink index obtained from both interictal and  
685 ictal activities, both the interictal sinking and ictal sourcing behaviours were observed for SOZ  
686 (Gunnarsdottir et al., 2022). In our work, DTF supported “sink SOZ” in the interictal data but showed  
687 insufficient evidence ( $0.1 < BF < 10$ ) for “source SOZ” in the ictal data (c.f., Figure 2A). As these  
688 previous studies only used one (Varotto et al., 2012) or a couple (Jiang et al., 2022; Narasimhan et al.,  
689 2020; Vlachos et al., 2017) of connectivity measures, there is a possibility that they have missed  
690 some features of connectivity to comprehensively test both hypotheses. Importantly, the above-  
691 mentioned studies, which tested the directionality of connectivity did not show opposite directions  
692 to our present work (i.e., opposite directionality would mean higher *in strength* in the interictal and  
693 higher *out strength* in the ictal period for non-SOZ than SOZ). In addition to the large set of  
694 connectivity measures and node metrics evaluated in the present work, which evaluates the  
695 connectivity more exhaustively, the larger sample size used here compared to those studies allows  
696 for a more powerful evaluation.

697

698 Our results suggest that rather than being the most central/connected in the network, the SOZ  
699 seems to separate from the rest of the network. It is important to note that our measures of  
700 connectivity were extracted from temporal patterns of activity. Therefore, the separation of the SOZ  
701 from the rest of the network is more in the temporal sense than spatial and may reflect a more  
702 complex and distributed network structure for the SOZ than the non-SOZ. In other words, while  
703 spatial proximity of areas can influence the similarity of their activities, separation here means  
704 dissimilarity in activity patterns rather than spatial location. This underlines the importance of  
705 considering temporal as well spatial features when investigating epileptogenic networks (Bartolomei  
706 et al., 2017). The separation of the SOZ is consistent with previous studies which evaluated the  
707 temporal dynamics of network configurations. For example, it has been shown that, immediately  
708 after the seizure onset, the correlation in the whole-brain network drops significantly (Kerr et al.,  
709 2011; Schindler et al., 2007) possibly because of SOZ becoming functionally disconnected from other  
710 areas (Warren et al., 2010), which becomes less pronounced later in the seizure (indeed, hyper-  
711 correlation of EEG activity in the latter part of seizures has been postulated to be an emergent  
712 regulatory mechanism to promote seizure termination (Schindler et al., 2007)). This is also probably  
713 why we observed generally higher discrimination of SOZ from non-SOZ immediately after the seizure  
714 compared to later epochs (c.f., Supplementary Figure 4). It is important to note that, while our

715 results showed evidence for neural activity dominantly flowing towards the SOZ in the interictal  
716 periods, whether this neural activity is inhibitory remains unclear. This is because connectivity  
717 methods can not determine whether the transmission is excitatory or inhibitory (Doss et al., 2024;  
718 Jiang et al., 2022; Lagarde & Bartolomei, 2024). Low voltage fast activity, the hallmark of focal seizure  
719 onset across species, has been shown to be associated with increased firing in GABA-ergic inhibitory  
720 interneurons (Gentiletti et al., 2022), triggered by accumulation of extra-cellular potassium. Studies  
721 to further evaluate links between electrophysiologic seizure evolution and associated ionic and  
722 neurotransmitter changes (e.g. using optogenetic and pharmacological approaches in animal models)  
723 have helped advance understanding of the dynamics of focal seizures (Wenzel et al., 2023), but more  
724 investigation is needed, and integrating directed connectivity methods into electrophysiologic  
725 models may be useful. Better understanding of the preictal to ictal transition may be of particular  
726 interest (Capitano et al., 2024)

727 Following more recent broad-band data-driven approaches (Gunnarsdottir et al., 2022), we used  
728 broad-band rather than narrow-band signals in our analyses. This aligns with studies which evaluated  
729 the connectivity over the broad-band frequency ranges and did not find any differences in  
730 directionality of signals across frequency bands (Doss et al., 2024; Jiang et al., 2022). Also, studies  
731 which suggested an effect of frequency on connectivity have reported inconsistent results. For  
732 example, while some studies have shown significantly higher *out/in degree* for EZ than non-EZ in the  
733 gamma-band activity (Wang et al., 2017) and higher outward connectivity using single-pulse  
734 electrical stimulation (Johnson et al., 2023), other studies have reported a significant decrease in  
735 outgoing connectivity from the SOZ in the gamma band frequencies during seizures (Janca et al.,  
736 2021).

737

738 Previous studies have also shown that the information in the node metrics (i.e., connectomics),  
739 extracted from directed connectivity measures, could discriminate the SOZ from non-SOZ (Sethi et  
740 al., 2016; Van Mierlo et al., 2013; Varotto et al., 2012; Vlachos et al., 2017; Wilke et al., 2011).  
741 Specifically, Wilke et al., (2011) found that the *betweenness centrality* was correlated with the  
742 location of resected cortical regions in patients with seizure-free outcomes. Van Mierlo et al. (2013)  
743 found that the electrode contacts with the highest *out degree* always lay within the resected brain  
744 regions and that the patient-specific connectivity patterns were consistent over majority of seizures.  
745 Sethi et al., (2016) analysed a network constructed from functional MRI (fMRI) data in patients with  
746 polymicrogyria and refractory epilepsy, and found that the polymicrogyric nodes showed significantly  
747 increased *clustering coefficients* and *characteristic path lengths* compared with the normal



748 contralateral homologous cortical regions. Varotto et al., (2012) analysed the connectivity pattern in  
749 patients with type II focal cortical dysplasia and found that *out density* can discriminate SOZ from  
750 non-SOZ. Vlachos et al., (2017) evaluated effective inflow obtained from several connectivity  
751 measures including (DCOH, PDCOH and DTF) in the interictal period to show that EZ has a higher  
752 *inflow* than non-EZ. Higher *Out degree* obtained from DTF in the ictal period accurately determined  
753 the EZ nodes in (Yang et al., 2018). The present work is among the few which directly and  
754 quantitatively compared the information in several node metrics. Previously, Mao et al., (2016), who  
755 used PDC, have shown that *in degree* and *betweenness centrality* had more localisation information  
756 than *in degree* in the ictal period. In contrast, another study, which used nonlinear correlation, found  
757 more information in *out degree* than *in degree* (Courstens et al., 2016). Current study builds on these  
758 previous studies, combines a set of 6 node metrics extracted from 13 distinct connectivity measures  
759 to show how accurately they can discriminate SOZ from non-SOZ. We found evidence ( $BF > 10$ ) for  
760 above-chance discrimination performance during both interictal and ictal windows, and the DI was  
761 among the most informative connectivity measures to localise the SOZ. We also found that  
762 *eccentricity* is even a more powerful biomarker for EZ localisation than *in strength* suggested in  
763 previous studies (Doss et al., 2024; Johnson et al., 2023).

764

765 It is of note that most of the previous studies have only indicated the discriminability of SOZ from  
766 non-SOZ contacts, rather than testing the generalisability of effects across new unseen contacts. Our  
767 ML-based method learns the connectivity patterns from a set of training contacts and was able to  
768 discriminate the SOZ from non-SOZ in unseen contacts. The lower performance of our node metrics,  
769 compared to our recent multi-featural localisation method on the same dataset (Karimi-Rouzbahani  
770 & McGonigal, 2024), can be explained by a variety of reasons including higher number of time  
771 windows incorporated in the analysis. It is of note that, while the results were above-chance, we did  
772 not optimise our classification/localisation pipeline, instead we focused on showing the plausibility of  
773 the method for localisation. To make the algorithm ready for real-world application, further  
774 optimisations in the pipeline can be made from the machine learning literature such as incorporating  
775 univariate signal features (Karimi-Rouzbahani & McGonigal, 2024), and data augmentation. The  
776 optimisation of the proposed pipeline is the subject of future work.

777

778 Among the 13 connectivity measures tested in this study only ANM supported both hypotheses. It  
779 may suggest that the patterns of activity and in turn connectivity significantly change from the  
780 interictal to the ictal period, which may lead to them being missed using any individual connectivity



781 measure. More specifically, while the connectivity between brain areas might be facilitated through  
782 the modulation of signal complexities in the interictal period (as captured by CDS and DI, Figure 2A),  
783 the connectivity between brain areas might be facilitated by frequency-domain modulations in the  
784 ictal period (as captured by SGC, Figure 2B). This makes sense as ictal activities have been shown to  
785 strongly modulate the signal power in several frequency bands (Grinenko et al., 2018).

786

787 This work tested two critical hypotheses in epilepsy research and provided evidence that the SOZ  
788 seems to dominantly receive neural activities from non-SOZ potentially to be suppressed between  
789 seizures, whereas it dominantly transmits neural activities to non-SOZ during seizures. We showed  
790 that not all directed connectivity measures can detect those changes in connectivity direction from  
791 the interictal to ictal period, as probably the nature of connectivity changes with seizure onset. We  
792 also showed that, using a combination of node connectivity metrics extracted from directed  
793 connectivity measures, it is possible to localise the SOZ with above-chance performance. These  
794 results shed new light on the configuration of brain networks in epilepsy and introduces a potential  
795 method for localising the SOZ using explainable machine learning algorithms, as well as providing a  
796 rationalized set of measures for further investigation of seizure dynamics.

797

## 798 Acknowledgements

799 We thank Mater Foundation and Mater Research Institute for supporting this study.

## 800 References

801

- 802 Amini, L., Jutten, C., Achard, S., David, O., Soltanian-Zadeh, H., Hossein-Zadeh, G. A., Kahane, P.,  
803 Minotti, L., & Vercueil, L. (2011). Directed differential connectivity graph of interictal  
804 epileptiform discharges. *IEEE Transactions on Biomedical Engineering*, *58*(4), 884–893.  
805 <https://doi.org/10.1109/TBME.2010.2099227>
- 806 An, N., Ye, X., Liu, Q., Xu, J., & Zhang, P. (2020). Localization of the epileptogenic zone based on ictal  
807 stereo-electroencephalogram: Brain network and single-channel signal feature analysis.  
808 *Epilepsy Research*, *167*. <https://doi.org/10.1016/j.eplepsyres.2020.106475>
- 809 Andrzejak, R. G., Schindler, K., & Rummel, C. (2012). Nonrandomness, nonlinear dependence, and  
810 nonstationarity of electroencephalographic recordings from epilepsy patients. *Physical Review E*  
811 *- Statistical, Nonlinear, and Soft Matter Physics*, *86*(4).  
812 <https://doi.org/10.1103/PhysRevE.86.046206>
- 813 Avoli, M., Biagini, G., & de Curtis, M. (2006). Do Interictal Spikes Sustain Seizures and  
814 Epileptogenesis? *Epilepsy Currents*, *6*(6), 203–207. [https://doi.org/10.1111/j.1535-](https://doi.org/10.1111/j.1535-7511.2006.00146.x)  
815 [7511.2006.00146.x](https://doi.org/10.1111/j.1535-7511.2006.00146.x)

- 816 Baccalá, L. A., & Sameshima, K. (2001). Partial directed coherence: a new concept in neural structure  
817 determination. *Biological Cybernetics*, *84*(6), 463–474. <https://doi.org/10.1007/PL00007990>
- 818 Balatskaya, A., Roehri, N., Lagarde, S., Pizzo, F., Medina, S., Wendling, F., Bénar, C. G., & Bartolomei, F.  
819 (2020a). The “Connectivity Epileptogenicity Index ” (cEI), a method for mapping the different  
820 seizure onset patterns in StereoElectroEncephalography recorded seizures. *Clinical*  
821 *Neurophysiology*, *131*(8), 1947–1955. <https://doi.org/10.1016/j.clinph.2020.05.029>
- 822 Balatskaya, A., Roehri, N., Lagarde, S., Pizzo, F., Medina, S., Wendling, F., Bénar, C. G., & Bartolomei, F.  
823 (2020b). The “Connectivity Epileptogenicity Index ” (cEI), a method for mapping the different  
824 seizure onset patterns in StereoElectroEncephalography recorded seizures. *Clinical*  
825 *Neurophysiology*, *131*(8), 1947–1955. <https://doi.org/10.1016/j.clinph.2020.05.029>
- 826 Bartolomei, F., Lagarde, S., Wendling, F., McGonigal, A., Jirsa, V., Guye, M., & Bénar, C. (2017).  
827 Defining epileptogenic networks: Contribution of SEEG and signal analysis. In *Epilepsia* (Vol. 58,  
828 Issue 7, pp. 1131–1147). Blackwell Publishing Inc. <https://doi.org/10.1111/epi.13791>
- 829 Bernabei, J. M., Li, A., Revell, A. Y., Smith, R. J., Gunnarsdottir, K. M., Ong, I. Z., Davis, K. A., Sinha, N.,  
830 Sarma, S., & Litt, B. (2023). Quantitative approaches to guide epilepsy surgery from intracranial  
831 EEG. *Brain*, *146*(6), 2248–2258. <https://doi.org/10.1093/brain/awad007>
- 832 Bernabei, J. M., Sinha, N., Arnold, T. C., Conrad, E., Ong, I., Pattnaik, A. R., Stein, J. M., Shinohara, R.  
833 T., Lucas, T. H., Bassett, D. S., Davis, K. A., & Litt, B. (2022). Normative intracranial EEG maps  
834 epileptogenic tissues in focal epilepsy. *Brain*, *145*(6), 1949–1961.  
835 <https://doi.org/10.1093/brain/awab480>
- 836 Bettus, G., Ranjeva, J. P., Wendling, F., Bénar, C. G., Confort-Gouny, S., Régis, J., Chauvel, P., Cozzone,  
837 P. J., Lemieux, L., Bartolomei, F., & Guye, M. (2011). Interictal functional connectivity of human  
838 epileptic networks assessed by intracerebral EEG and BOLD signal fluctuations. *PLoS ONE*, *6*(5).  
839 <https://doi.org/10.1371/journal.pone.0020071>
- 840 Bettus, G., Wendling, F., Guye, M., Valton, L., Régis, J., Chauvel, P., & Bartolomei, F. (2008). Enhanced  
841 EEG functional connectivity in mesial temporal lobe epilepsy. *Epilepsy Research*, *81*(1), 58–68.  
842 <https://doi.org/10.1016/j.eplepsyres.2008.04.020>
- 843 Blöbaum, P., Janzing, D., Washio, T., Shimizu, S., & Schölkopf, B. (2018). *Cause-Effect Inference by*  
844 *Comparing Regression Errors*.
- 845 Capitano, F., Kuchenbuch, M., Lavigne, J., Chaptoukaev, H., Zuluaga, M. A., Lorenzi, M., Nabbout, R.,  
846 & Mantegazza, M. (2024). Preictal dysfunctions of inhibitory interneurons paradoxically lead to  
847 their rebound hyperactivity and to low-voltage-fast onset seizures in Dravet syndrome.  
848 *Proceedings of the National Academy of Sciences*, *121*(23).  
849 <https://doi.org/10.1073/pnas.2316364121>
- 850 Chen, Z., Brodie, M. J., Liew, D., & Kwan, P. (2018). Treatment Outcomes in Patients With Newly  
851 Diagnosed Epilepsy Treated With Established and New Antiepileptic Drugs. *JAMA Neurology*,  
852 *75*(3), 279. <https://doi.org/10.1001/jamaneurol.2017.3949>
- 853 Cliff, O. M., Bryant, A. G., Lizier, J. T., Tsuchiya, N., & Fulcher, B. D. (2023). Unifying pairwise  
854 interactions in complex dynamics. *Nature Computational Science*, *3*(10), 883–893.  
855 <https://doi.org/10.1038/s43588-023-00519-x>

- 856 Courtens, S., Colombet, B., Trébuchon, A., Brovelli, A., Bartolomei, F., & Bénar, C. G. (2016). Graph  
857 Measures of Node Strength for Characterizing Preictal Synchrony in Partial Epilepsy. *Brain*  
858 *Connectivity*, 6(7), 530–539. <https://doi.org/10.1089/brain.2015.0397>
- 859 Di Giacomo, R., Burini, A., Chiarello, D., Pelliccia, V., Deleo, F., Garbelli, R., de Curtis, M., Tassi, L., &  
860 Gnatkovsky, V. (2024). Ictal fast activity *chirps* as markers of the epileptogenic zone. *Epilepsia*,  
861 65(6). <https://doi.org/10.1111/epi.17995>
- 862 Doss, D. J., Shless, J. S., Bick, S. K., Makhoul, G. S., Negi, A. S., Bibro, C. E., Rashingkar, R.,  
863 Gummadavelli, A., Chang, C., Gallagher, M. J., Naftel, R. P., Reddy, S. B., Williams-Roberson, S.,  
864 Morgan, V. L., Johnson, G. W., & Englot, D. J. (2024). The interictal suppression hypothesis is the  
865 dominant differentiator of seizure onset zones in focal epilepsy. *Brain*.  
866 <https://doi.org/10.1093/brain/awae189>
- 867 Eichler, M. (2006). On the evaluation of information flow in multivariate systems by the directed  
868 transfer function. *Biological Cybernetics*, 94(6), 469–482. [https://doi.org/10.1007/s00422-006-](https://doi.org/10.1007/s00422-006-0062-z)  
869 0062-z
- 870 Friston, K. J., Bastos, A. M., Oswal, A., van Wijk, B., Richter, C., & Litvak, V. (2014). Granger causality  
871 revisited. *NeuroImage*, 101, 796–808. <https://doi.org/10.1016/j.neuroimage.2014.06.062>
- 872 Gallagher, R., Sinha, N., Pattnaik, A., Ojemann, W., Lucas, A., LaRocque, J., Bernabei, J., Greenblatt, A.,  
873 Sweeney, E., Chen, I., Davis, K., Conrad, E., & Litt, B. (2023). Quantifying interictal intracranial  
874 EEG to predict focal epilepsy. *ArXiv*, *arXiv:2307.15170*.
- 875 Gentiletti, D., de Curtis, M., Gnatkovsky, V., & Suffczynski, P. (2022). Focal seizures are organized by  
876 feedback between neural activity and ion concentration changes. *ELife*, 11.  
877 <https://doi.org/10.7554/eLife.68541>
- 878 Grinenko, O., Li, J., Mosher, J. C., Wang, I. Z., Bulacio, J. C., Gonzalez-Martinez, J., Nair, D., Najm, I.,  
879 Leahy, R. M., & Chauvel, P. (2018). A fingerprint of the epileptogenic zone in human epilepsies.  
880 *Brain*, 141(1), 117–131. <https://doi.org/10.1093/brain/awx306>
- 881 Gunnarsdottir, K. M., Li, A., Smith, R. J., Kang, J.-Y., Korzeniewska, A., Crone, N. E., Rouse, A. G., Cheng,  
882 J. J., Kinsman, M. J., Landazuri, P., Uysal, U., Ulloa, C. M., Cameron, N., Cajigas, I., Jagid, J.,  
883 Kanner, A., Elarjani, T., Bicchi, M. M., Inati, S., ... Sarma, S. V. (2022). Source-sink connectivity: a  
884 novel interictal EEG marker for seizure localization. *Brain*, 145(11), 3901–3915.  
885 <https://doi.org/10.1093/brain/awac300>
- 886 HANNAN, E. J., & THOMSON, P. J. (1973). Estimating group delay. *Biometrika*, 60(2), 241–253.  
887 <https://doi.org/10.1093/biomet/60.2.241>
- 888 Hoyer, P. O., Janzing, D., Mooij, J., Peters, J., & Schölkopf, B. (n.d.). *Nonlinear causal discovery with*  
889 *additive noise models*.
- 890 Janca, R., Jahodova, A., Hlinka, J., Jezdik, P., Svobodova, L., Kudr, M., Kalina, A., Marusic, P., Krsek, P.,  
891 & Jiruska, P. (2021). Ictal gamma-band interactions localize ictogenic nodes of the epileptic  
892 network in focal cortical dysplasia. *Clinical Neurophysiology*, 132(8), 1927–1936.  
893 <https://doi.org/10.1016/j.clinph.2021.04.016>
- 894 Janzing, D., Mooij, J., Zhang, K., Lemeire, J., Zscheischler, J., Daniušis, P., Steudel, B., & Schölkopf, B.  
895 (2012). Information-geometric approach to inferring causal directions. *Artificial Intelligence*,  
896 182–183, 1–31. <https://doi.org/10.1016/j.artint.2012.01.002>

- 897     Jeffreys, H. (1998). *The theory of probability*. OuP Oxford.
- 898     Jiang, H., Kokkinos, V., Ye, S., Urban, A., Bagić, A., Richardson, M., & He, B. (2022). Interictal SEEG  
899         Resting-State Connectivity Localizes the Seizure Onset Zone and Predicts Seizure Outcome.  
900         *Advanced Science*, 9(18). <https://doi.org/10.1002/advs.202200887>
- 901     Johnson, G. W., Doss, D. J., Morgan, V. L., Paulo, D. L., Cai, L. Y., Shless, J. S., Negi, A. S., Gummadavelli,  
902         A., Kang, H., Reddy, S. B., Naftel, R. P., Bick, S. K., Williams Roberson, S., Dawant, B. M., Wallace,  
903         M. T., & Englot, D. J. (2023). The Interictal Suppression Hypothesis in focal epilepsy: network-  
904         level supporting evidence. *Brain*, 146(7), 2828–2845. <https://doi.org/10.1093/brain/awad016>
- 905     Jung, Y. J., Kang, H. C., Choi, K. O., Lee, J. S., Kim, D. S., Cho, J. H., Kim, S. H., Im, C. H., & Kim, H. D.  
906         (2011). Localization of ictal onset zones in Lennox-Gastaut syndrome using directional  
907         connectivity analysis of intracranial electroencephalography. *Seizure*, 20(6), 449–457.  
908         <https://doi.org/10.1016/j.seizure.2011.02.004>
- 909     Karimi-Rouzbahani, H. (2024). Evidence for Multiscale Multiplexed Representation of Visual Features  
910         in EEG. *Neural Computation*, 36(3), 412–436. [https://doi.org/10.1162/neco\\_a\\_01649](https://doi.org/10.1162/neco_a_01649)
- 911     Karimi-Rouzbahani, H., & McGonigal, A. (2024). Generalisability of epileptiform patterns across time  
912         and patients. *Scientific Reports*, 14(1), 6293. <https://doi.org/10.1038/s41598-024-56990-7>
- 913     Karimi-Rouzbahani, H., Ramezani, F., Woolgar, A., Rich, A., & Ghodrati, M. (2021). Perceptual  
914         difficulty modulates the direction of information flow in familiar face recognition. *NeuroImage*,  
915         233, 117896. <https://doi.org/10.1016/j.neuroimage.2021.117896>
- 916     Karimi-Rouzbahani, H., Shahmohammadi, M., Vahab, E., Setayeshi, S., & Carlson, T. (2021). Temporal  
917         Variabilities Provide Additional Category-Related Information in Object Category Decoding: A  
918         Systematic Comparison of Informative EEG Features. *Neural Computation*, 1–46.  
919         [https://doi.org/10.1162/neco\\_a\\_01436](https://doi.org/10.1162/neco_a_01436)
- 920     Karimi-Rouzbahani, H., Vogrin, S., Cao, M., Plummer, C., & McGonigal, A. (2024). Multimodal and  
921         Quantitative Analysis of the Epileptogenic Zone in the Pre-Surgical Evaluation of Drug-Resistant  
922         Focal Epilepsy. *MedRxiv*.
- 923     Karimi-Rouzbahani, H., & Woolgar, A. (2022). When the Whole Is Less Than the Sum of Its Parts:  
924         Maximum Object Category Information and Behavioral Prediction in Multiscale Activation  
925         Patterns. *Frontiers in Neuroscience*, 16. <https://doi.org/10.3389/fnins.2022.825746>
- 926     Karimi-Rouzbahani, H., Woolgar, A., Henson, R., & Nili, H. (2022). Caveats and Nuances of Model-  
927         Based and Model-Free Representational Connectivity Analysis. *Frontiers in Neuroscience*, 16.  
928         <https://doi.org/10.3389/fnins.2022.755988>
- 929     Kerr, M. S. D., Burns, S. P., Gale, J., Gonzalez-Martinez, J., Bulacio, J., & Sarma, S. V. (2011).  
930         Multivariate analysis of SEEG signals during seizure. *Proceedings of the Annual International*  
931         *Conference of the IEEE Engineering in Medicine and Biology Society, EMBS*, 8279–8282.  
932         <https://doi.org/10.1109/IEMBS.2011.6092041>
- 933     Kini, L. G., Bernabei, J. M., Mikhail, F., Hadar, P., Shah, P., Khambhati, A. N., Oechsel, K., Archer, R.,  
934         Boccanfuso, J., Conrad, E., Shinohara, R. T., Stein, J. M., Das, S., Kheder, A., Lucas, T. H., Davis, K.  
935         A., Bassett, D. S., & Litt, B. (2019). Virtual resection predicts surgical outcome for drug-resistant  
936         epilepsy. *Brain*, 142(12), 3892–3905. <https://doi.org/10.1093/brain/awz303>

- 937 Kramer, M. A., & Cash, S. S. (2012). Epilepsy as a disorder of cortical network organization. In  
938 *Neuroscientist* (Vol. 18, Issue 4, pp. 360–372). <https://doi.org/10.1177/1073858411422754>
- 939 Kwan, P., & Brodie, M. J. (2000). Early Identification of Refractory Epilepsy. *New England Journal of*  
940 *Medicine*, 342(5), 314–319. <https://doi.org/10.1056/NEJM200002033420503>
- 941 Lagarde, S., & Bartolomei, F. (2024). Sink into the epileptogenic zone: findings from directed SEEG  
942 functional connectivity decomposition. *Brain*. <https://doi.org/10.1093/brain/awae256>
- 943 Lagarde, S., Bénar, C. G., Wendling, F., & Bartolomei, F. (2022). Interictal Functional Connectivity in  
944 Focal Refractory Epilepsies Investigated by Intracranial EEG. In *Brain Connectivity* (Vol. 12, Issue  
945 10, pp. 850–869). Mary Ann Liebert Inc. <https://doi.org/10.1089/brain.2021.0190>
- 946 Lagarde, S., Buzori, S., Trebuchon, A., Carron, R., Scavarda, D., Milh, M., McGonigal, A., & Bartolomei,  
947 F. (2019). The repertoire of seizure onset patterns in human focal epilepsies: Determinants and  
948 prognostic values. *Epilepsia*, 60(1), 85–95. <https://doi.org/10.1111/epi.14604>
- 949 Lagarde, S., Roehri, N., Lambert, I., Trébuchon, A., MCGonigal, A., Carron, R., Scavarda, D., Milh, M.,  
950 Pizzo, F., & Colombet, B. (2018). Interictal stereotactic-EEG functional connectivity in refractory  
951 focal epilepsies. *Brain-A Journal of Neurology*, 10, 2966–2980.  
952 <https://doi.org/10.1093/brain/awy214i>
- 953 Lagarde, S., Roehri, N., Lambert, I., Trebuchon, A., McGonigal, A., Carron, R., Scavarda, D., Milh, M.,  
954 Pizzo, F., Colombet, B., Giusiano, B., Medina Villalon, S., Guye, M., Bénar, C. G., & Bartolomei, F.  
955 (2018). Interictal stereotactic-EEG functional connectivity in refractory focal epilepsies. *Brain*,  
956 141(10), 2966–2980. <https://doi.org/10.1093/brain/awy214>
- 957 Li, A., Chennuri, B., Subramanian, S., Yaffe, R., Gliske, S., Stacey, W., Norton, R., Jordan, A., Zaghoul,  
958 K. A., Inati, S. K., Agrawal, S., Haagensen, J. J., Hopp, J., Atallah, C., Johnson, E., Crone, N.,  
959 Anderson, W. S., Fitzgerald, Z., Bulacio, J., ... Gonzalez-Martinez, J. (2018). Using network  
960 analysis to localize the epileptogenic zone from invasive EEG recordings in intractable focal  
961 epilepsy. *Network Neuroscience*, 2(2), 218–240. [https://doi.org/10.1162/netn\\_a\\_00043](https://doi.org/10.1162/netn_a_00043)
- 962 Li, A., Huynh, C., Fitzgerald, Z., Cajigas, I., Brusko, D., Jagid, J., Claudio, A. O., Kanner, A. M., Hopp, J.,  
963 Chen, S., Haagensen, J., Johnson, E., Anderson, W., Crone, N., Inati, S., Zaghoul, K. A., Bulacio,  
964 J., Gonzalez-Martinez, J., & Sarma, S. V. (2021). Neural fragility as an EEG marker of the seizure  
965 onset zone. *Nature Neuroscience*, 24(10), 1465–1474. [https://doi.org/10.1038/s41593-021-](https://doi.org/10.1038/s41593-021-00901-w)  
966 00901-w
- 967 Li, Z., Zhang, H., Niu, S., & Xing, Y. (2023). Localizing epileptogenic zones with high-frequency  
968 oscillations and directed connectivity. *Seizure: European Journal of Epilepsy*, 111, 9–16.  
969 <https://doi.org/10.1016/j.seizure.2023.07.013>
- 970 Liou, J., Smith, E. H., Bateman, L. M., Bruce, S. L., McKhann, G. M., Goodman, R. R., Emerson, R. G.,  
971 Schevon, C. A., & Abbott, L. (2020). A model for focal seizure onset, propagation, evolution, and  
972 progression. *eLife*, 9. <https://doi.org/10.7554/eLife.50927>
- 973 Liu, X., Han, F., Fu, R., Wang, Q., & Luan, G. (2021). Epileptogenic Zone Location of Temporal Lobe  
974 Epilepsy by Cross-Frequency Coupling Analysis. *Frontiers in Neurology*, 12.  
975 <https://doi.org/10.3389/fneur.2021.764821>



- 976 Mao, J. W., Ye, X. L., Li, Y. H., Liang, P. J., Xu, J. W., & Zhang, P. M. (2016). Dynamic network  
977 connectivity analysis to identify epileptogenic zones based on stereo-electroencephalography.  
978 *Frontiers in Computational Neuroscience*, 10(OCT). <https://doi.org/10.3389/fncom.2016.00113>
- 979 Massey, J. L. (1990). CAUSALITY, FEEDBACK AND DIRECTED INFORMATION. In *Intl. Symp. on Info. Th.*  
980 *and its Applications*.
- 981 Mooij, A. H., Frauscher, B., Gotman, J., & Huiskamp, G. J. M. (2020). A skew-based method for  
982 identifying intracranial EEG channels with epileptic activity without detecting spikes, ripples, or  
983 fast ripples. *Clinical Neurophysiology*, 131(1), 183–192.  
984 <https://doi.org/10.1016/j.clinph.2019.10.025>
- 985 Nahvi, M., Ardeshir, G., Ezoji, M., Tafakhori, A., Shafiee, S., & Babajani-Feremi, A. (2023). An  
986 application of dynamical directed connectivity of ictal intracranial EEG recordings in seizure  
987 onset zone localization. *Journal of Neuroscience Methods*, 386.  
988 <https://doi.org/10.1016/j.jneumeth.2022.109775>
- 989 Narasimhan, S., Kundassery, K. B., Gupta, K., Johnson, G. W., Wills, K. E., Goodale, S. E., Haas, K.,  
990 Rolston, J. D., Naftel, R. P., Morgan, V. L., Dawant, B. M., González, H. F. J., & Englot, D. J. (2020).  
991 Seizure-onset regions demonstrate high inward directed connectivity during resting-state: An  
992 SEEG study in focal epilepsy. *Epilepsia*, 61(11), 2534–2544. <https://doi.org/10.1111/epi.16686>
- 993 Nolte GUIDONOLTE, G., Ziehe ZIEHE, A., Krämer NKRAEMER, N., Popescu FLORINPOPESCU, F., Nolte,  
994 G., Ziehe, A., Krämer, N., Popescu, F., & Müller NOLTE ZIEHE KRÄMER POPESCU MÜLLER, K.  
995 (n.d.). Comparison of Granger Causality and Phase Slope Index Klaus-Robert Müller. In *JMLR*  
996 *Workshop and Conference Proceedings* (Vol. 6).
- 997 Paulo, D. L., Wills, K. E., Johnson, G. W., Gonzalez, H. F. J., Rolston, J. D., Naftel, R. P., Reddy, S. B.,  
998 Morgan, V. L., Kang, H., Williams Roberson, S., Narasimhan, S., & Englot, D. J. (2022). SEEG  
999 Functional Connectivity Measures to Identify Epileptogenic Zones. *Neurology*, 98(20).  
1000 <https://doi.org/10.1212/WNL.0000000000200386>
- 1001 Plomp, G., Quairiaux, C., Michel, C. M., & Astolfi, L. (2014). The physiological plausibility of time-  
1002 varying Granger-causal modeling: Normalization and weighting by spectral power. *NeuroImage*,  
1003 97, 206–216. <https://doi.org/10.1016/j.neuroimage.2014.04.016>
- 1004 Roehri, N., Pizzo, F., Lagarde, S., Lambert, I., Nica, A., McGonigal, A., Giusiano, B., Bartolomei, F., &  
1005 Bénar, C. G. (2018). High-frequency oscillations are not better biomarkers of epileptogenic  
1006 tissues than spikes. *Annals of Neurology*, 83(1), 84–97. <https://doi.org/10.1002/ana.25124>
- 1007 Rouder, J. N., Morey, R. D., Speckman, P. L., & Province, J. M. (2012). Default Bayes factors for ANOVA  
1008 designs. *Journal of Mathematical Psychology*, 56(5), 356–374.  
1009 <https://doi.org/10.1016/j.jmp.2012.08.001>
- 1010 Rubinov, M., & Sporns, O. (2010). Complex network measures of brain connectivity: Uses and  
1011 interpretations. *NeuroImage*, 52(3), 1059–1069.  
1012 <https://doi.org/10.1016/j.neuroimage.2009.10.003>
- 1013 Runfola, C., Sheheitli, H., Bartolomei, F., Wang, H., & Jirsa, V. (2023). In pursuit of the epileptogenic  
1014 zone in focal epilepsy: a dynamical network biomarker approach. *Communications in Nonlinear*  
1015 *Science and Numerical Simulation*, 117, 106973. <https://doi.org/10.1016/j.cnsns.2022.106973>

- 1016 Ryvlin, P., Barba, C., Bartolomei, F., Baumgartner, C., Brazdil, M., Fabo, D., Fahoum, F., Frauscher, B.,  
1017 Ikeda, A., Lhatoo, S., Mani, J., McGonigal, A., Metsahonkala, E., Mindruta, I., Nguyen, D. K.,  
1018 Rheims, S., Rocamora, R., Rydenhag, B., Schuele, S., ... Beniczky, S. (2024). Grading system for  
1019 assessing the confidence in the epileptogenic zone reported in published studies: A Delphi  
1020 consensus study. *Epilepsia*, *65*(5), 1346–1359. <https://doi.org/10.1111/epi.17928>
- 1021 Sato, Y., Ochi, A., Mizutani, T., & Otsubo, H. (2019). Low entropy of interictal gamma oscillations is a  
1022 biomarker of the seizure onset zone in focal cortical dysplasia type II. *Epilepsy and Behavior*, *96*,  
1023 155–159. <https://doi.org/10.1016/j.yebeh.2019.01.030>
- 1024 Schevon, C. A., Weiss, S. A., McKhann, G., Goodman, R. R., Yuste, R., Emerson, R. G., & Trevelyan, A. J.  
1025 (2012). Evidence of an inhibitory restraint of seizure activity in humans. *Nature*  
1026 *Communications*, *3*(1), 1060. <https://doi.org/10.1038/ncomms2056>
- 1027 Schindler, K., Leung, H., Elger, C. E., & Lehnertz, K. (2007). Assessing seizure dynamics by analysing  
1028 the correlation structure of multichannel intracranial EEG. *Brain*, *130*(1), 65–77.  
1029 <https://doi.org/10.1093/brain/awl304>
- 1030 Sethi, M., Pedersen, M., & Jackson, G. D. (2016). Polymicrogyric Cortex may Predispose to Seizures  
1031 via Abnormal Network Topology: An fMRI Connectomics Study. *Epilepsia*, *57*(3).  
1032 <https://doi.org/10.1111/epi.13304>
- 1033 Spencer, S. S. (2002). Neural Networks in Human Epilepsy: Evidence of and Implications for  
1034 Treatment. *Epilepsia*, *43*(3), 219–227. <https://doi.org/10.1046/j.1528-1157.2002.26901.x>
- 1035 Vakharia, V. N., Duncan, J. S., Witt, J., Elger, C. E., Staba, R., & Engel, J. (2018). Getting the best  
1036 outcomes from epilepsy surgery. *Annals of Neurology*, *83*(4), 676–690.  
1037 <https://doi.org/10.1002/ana.25205>
- 1038 Van Mierlo, P., Carrette, E., Hallez, H., Raedt, R., Meurs, A., Vandenberghe, S., Van Roost, D., Boon, P.,  
1039 Staelens, S., & Vonck, K. (2013). Ictal-onset localization through connectivity analysis of  
1040 intracranial EEG signals in patients with refractory epilepsy. *Epilepsia*, *54*(8), 1409–1418.  
1041 <https://doi.org/10.1111/epi.12206>
- 1042 Varotto, G., Tassi, L., Franceschetti, S., Spreafico, R., & Panzica, F. (2012). Epileptogenic networks of  
1043 type II focal cortical dysplasia: A stereo-EEG study. *NeuroImage*, *61*(3), 591–598.  
1044 <https://doi.org/10.1016/j.neuroimage.2012.03.090>
- 1045 Vlachos, I., Krishnan, B., Treiman, D. M., Tsakalis, K., Kugiumtzis, D., & Iasemidis, L. D. (2017). The  
1046 Concept of Effective Inflow: Application to Interictal Localization of the Epileptogenic Focus  
1047 From iEEG. *IEEE Transactions on Biomedical Engineering*, *64*(9), 2241–2252.  
1048 <https://doi.org/10.1109/TBME.2016.2633200>
- 1049 Wang, M. yang, Wang, J., Zhou, J., Guan, Y. guang, Zhai, F., Liu, C. qing, Xu, F. fei, Han, Y. xian, Yan, Z.  
1050 fen, & Luan, G. ming. (2017). Identification of the epileptogenic zone of temporal lobe epilepsy  
1051 from stereo-electroencephalography signals: A phase transfer entropy and graph theory  
1052 approach. *NeuroImage: Clinical*, *16*, 184–195. <https://doi.org/10.1016/j.nicl.2017.07.022>
- 1053 Warren, C. P., Hu, S., Stead, M., Brinkmann, B. H., Bower, M. R., & Worrell, G. A. (2010). Synchrony in  
1054 Normal and Focal Epileptic Brain: The Seizure Onset Zone is Functionally Disconnected. *Journal*  
1055 *of Neurophysiology*, *104*(6), 3530–3539. <https://doi.org/10.1152/jn.00368.2010>



- 1056 Wenzel, M., Huberfeld, G., Grayden, D. B., de Curtis, M., & Trevelyan, A. J. (2023). A debate on the  
1057 neuronal origin of focal seizures. *Epilepsia*, *64*(S3). <https://doi.org/10.1111/epi.17650>
- 1058 Wilke, C., Drongelen, W. van, Kohrman, M., & He, B. (2009). Identification of epileptogenic foci from  
1059 causal analysis of ECoG interictal spike activity. *Clinical Neurophysiology*, *120*(8), 1449–1456.  
1060 <https://doi.org/10.1016/j.clinph.2009.04.024>
- 1061 Wilke, C., Worrell, G., & He, B. (2011). Graph analysis of epileptogenic networks in human partial  
1062 epilepsy. *Epilepsia*, *52*(1), 84–93. <https://doi.org/10.1111/j.1528-1167.2010.02785.x>
- 1063 Yang, C., Luan, G., Wang, Q., Liu, Z., Zhai, F., & Wang, Q. (2018). Localization of epileptogenic zone  
1064 with the correction of pathological networks. *Frontiers in Neurology*, *9*(MAR).  
1065 <https://doi.org/10.3389/fneur.2018.00143>
- 1066 Zellner, A., & Siow, A. (1980). Posterior odds ratios for selected regression hypotheses. *Trabajos de*  
1067 *Estadística Y de Investigacion Operativa*, *31*(1), 585–603. <https://doi.org/10.1007/BF02888369>
- 1068
